# 1 On the cortical mapping function – visual space, cortical 2 space, and crowding

3 **Hans Strasburger**

4 Ludwig-Maximilians-Universität München

5 [www.hans.strasburger.de](http://www.hans.strasburger.de)

6 For submission to *Vision Research*

## 7 **Abstract**

8 The retino-cortical visual pathway is retinotopically organized: Neighbourhood relationships  
9 on the retina are preserved in the mapping to the cortex. Size relationships in that mapping  
10 are also highly regular: The size of a patch in the visual field that maps onto a cortical patch  
11 of fixed size follows, along any radius and in a wide range, simply a linear function with  
12 retinal eccentricity. As a consequence, and under simplifying assumptions, the mapping of  
13 retinal to cortical locations follows a logarithmic function along that radius. While this has  
14 already been shown by Fischer (1973), the link between the linear function – which  
15 describes the local behaviour by the cortical magnification factor  $M$  – and the logarithmic  
16 location function for the global behaviour, has never been made fully explicit. The present  
17 paper provides such a link as a set of ready-to-use equations using Levi and Klein's  $E_2$   
18 nomenclature, and examples for their validity and applicability in the retinotopic mapping  
19 literature are discussed. The equations allow estimating  $M$  in the retinotopic centre and  
20 values thus derived from the literature are provided. A new structural parameter,  $d_2$ , is  
21 proposed to characterize the cortical map, as a cortical counterpart to  $E_2$ , and typical values  
22 for it are given. One pitfall is discussed and spelt out as a set of equations, namely the  
23 common myth that a pure logarithmic function will give an adequate map: The popular  
24 omission of a constant term renders the equations ill defined in, and around, the retinotopic  
25 centre. The correct equations are finally extended to describe the cortical map of Bouma's  
26 law on visual crowding. The result contradicts recent suggestions that critical crowding  
27 distance corresponds to a constant cortical distance.

28 **Keywords:** Cortical map; logarithmic map; cortical magnification factor; visual cortex;  $M$ -  
29 scaling;  $E_2$  value; retinotopy;  $M_0$ ; retinotopic centre; Bouma's Law; crowding; myths; visual  
30 field; local/global

## 31 **Introduction**

32 One of the most beautiful organizational principles of the human brain is that of  
33 topographical mapping. Whilst perhaps universal to the brain, its regularity is most apparent  
34 for the three primary senses mediated through the thalamus – sight, hearing, and touch –  
35 i.e., in retinotopy, tonotopy, and somatotopy. For the visual domain with which we are  
36 concerned here, the regularity of topography is particularly striking and is at a level that  
37 lends itself to mathematical description by analytic functions. The seminal papers by Fischer  
38 (1973) and Schwartz (1977, 1980) derive the complex logarithm as a suitable function for  
39 mapping the location in the visual field to the location of its projection's in (a flat-map of)  
40 the primary visual cortex, by which the visual field's polar-coordinate grid gets mapped onto

41 a rectilinear cortical grid. The log function's image domain – the complex plane – is  
42 reinterpreted thereby as a two-dimensional real plane.<sup>1</sup> As Schwartz explains in the two  
43 papers, the rationale for employing the log function in the radial direction is that its first  
44 derivative is an inverse-linear function, the latter implicit in the cortical magnification  
45 concept for the visual field as proposed by Daniel & Whitteridge (1961). Expressed more  
46 directly, the *integral* of an inverse linear function is the logarithmic function. Intuitively,  
47 summing-up (integrating over) little steps on the cortical map, where each step obeys  
48 cortical magnification, will result in the log mapping.

49 Schwartz's (1977, 1980) papers with the complex-log mapping have become rather popular  
50 in visual psychophysics and visual neurophysiology. Van Essen, Newsome & Maunsell (1984),  
51 e.g., use it for explaining the topography of the macaque's primary visual cortex, writing  
52 "Along the axis corresponding to constant polar angle, magnification is inversely  
53 proportional to eccentricity, and hence distance is proportional to the logarithm of  
54 eccentricity ( $x \propto \log E$ )" (p. 437). Levi, Klein & Aitsebaomo (1985, Fig. 14) and Virsu et al.  
55 (1987, Fig. 7) plot psychophysical thresholds in terms of cortical units. As another example,  
56 Klein & Levi (1987), in the context of modelling hyperacuity in peripheral vision, derive from  
57 the log rule that, if vernier-acuity offsets are assumed to have a constant cortical  
58 representation – i.e. one that is independent of eccentricity – vernier offsets will depend  
59 linearly on eccentricity in the visual field (we will come back to that in the last section).  
60 Horton & Hoyt (1991) use it to point out that the well-known inverse-linear function for the  
61 cortical magnification factor  $M$  (CMF) follows from a log-spaced cortical map. Engel et al.  
62 (1997, Fig. 9, Fig 12; 1994, Fig. 2), and Larsson & Heeger (2006), use the (real-valued) log  
63 function implicitly when they use an exponential for the inverse location function (which  
64 corresponds to a log forward mapping). Duncan & Boynton (2003) fit their fMRI activity  
65 maps for the V1 topology using Schwartz's complex-log mapping. The most advanced  
66 development is Schira, Tyler, Spehar & Breakspear's (2010) closed-form analytic  
67 representation for the cortical maps, at the same time accommodating for the horizontal-  
68 vertical anisotropy and preserving cortical area constancy across meridians by an added  
69 shear function.

70 While Fischer's and Schwartz's papers present the mathematical relationships  
71 (with examples for their application) Klein & Levi (1987) provide an *empirical* link between  
72 psychophysical data and location on the cortical map. For characterizing the inverse-linear  
73 CMF-vs-eccentricity function, they use a concept they had developed earlier for  
74 psychophysical results (Levi, Klein, & Aitsebaomo, 1984; Levi et al., 1985): The slope of that  
75 linear function, when normalized to the foveal value, can be quantified by a single number,  
76 called  $E_2$ . The concept is illustrated graphically in Figure 1B below: In an x-y plot vs  
77 eccentricity,  $E_2$  is the (negative) X-axis intercept or, alternatively, the (positive) eccentricity  
78 value at which the foveal value is incremented by itself (i.e., doubles). Klein & Levi (1987)  
79 further bridge the gap to proportionality when they show that relationships become simpler  
80 and more accurate when the data are not treated as a function of eccentricity  $E$  itself, but of  
81 a transformed eccentricity,  $E^*$ , referred to as *effective eccentricity*,  $E^* = E + E_2$ . The *linear*  
82 cortical magnification function thereby turns into *proportionality*. In the cortical map,  
83 locations – i.e. distances from the retinotopic centre – are then proportional to the

---

<sup>1</sup> Note that the elegance of the complex-log representation is deceiving in that not all properties of the complex plane have a counterpart in the 2D real plane (which is undesirable for a mathematical representation). For example, the square of a value on the upper vertical meridian does not correspond to a value on the left horizontal meridian, as would be implied by  $i^2 = -1$ .

84 logarithm of effective eccentricity,  $x \propto \log(E+E_2)$ . The approach is verified by showing the  
85 empirical data both as thresholds and in cortical units (Klein & Levi, 1987, Fig. 5; for rescaling  
86 that figure's right ordinate the authors posit that 1 mm of cortex corresponds to ~10% of  
87 effective eccentricity).

88 However, the papers discussed so far have not yet fully exploited the tight mathematical link  
89 between the linear and the logarithmic law for its empirical use. While the basic  
90 mathematical form of the mapping function –  $\log(E)$  or  $\log(E+E_2)$  – is drawn upon and made  
91 use of, further parameters are left free to vary and to be determined by fitting to the data.  
92 The derivations in the present paper take the log-mapping approach one step further. Unlike  
93 these and other papers (discussed below), the parameters for the logarithmic map are here  
94 obtained by mathematical derivation from the linear law. In a neuroscience context, that law  
95 will be the inverse of the CMF. For the psychophysicist, measures of low-level visual-  
96 perceptual function like the minimal angle of resolution (MAR) can be an approximation. In  
97 both cases, Levi and Klein's  $E_2$  concept is the basis here. We thereby arrive at a set of fully  
98 explicit equations that allow converting the linear, local-behaviour law of the CMF, specified  
99 by  $E_2$ , to a description of the global behaviour, the *location* on the cortical map. These  
100 equations are the message of the paper. In a next step, the empirical data for the cortical  
101 maps (from fMRI or single-cell analysis) are then used to verify the correctness of those  
102 parametrical equations. This approach represents a more principled one than before. It  
103 further places additional constraints on the describing functions, thus adding to their  
104 reliability.

105 Since such derivations have been attempted before and have led to erroneous results or  
106 have stopped short of exploring the implications, derivations are presented in a step-by-step  
107 manner, considering at each step what that means. Key equations are highlighted by  
108 surrounding boxes for easy spotting, i.e. those that should be of practical use in describing  
109 the cortical map. Or, for example, for obtaining improved estimates for the foveal CMF,  $M_0$ .

110 Instead of the complex log we here consider the simpler case of the real-valued, 1D  
111 mapping, where *eccentricity* in the visual field, expressed in degrees of visual angle along a  
112 radius, is mapped onto the *distance* of its representation from the retinotopic centre,  
113 expressed in millimetres. The resulting real-valued logarithmic function shall be called the  
114 *cortical location function*. Taking the 1D case implies no loss of generality; the function is  
115 easily generalized to the 2D case by writing it as a vector function. Compared to the complex  
116 log, the real function has the added advantage of allowing separate parameters for the  
117 horizontal and vertical meridian, required to meet the visual field's horizontal-vertical  
118 anisotropy.

119 Once these relationships for the cortical location function are established, they need to be  
120 verified by empirical data. We use data from the literature and our own for this. It turns out  
121 that not only do the fits work excellently, and even better than the original fits, but that the  
122 constraints imposed by the parametric equations can also be used for the long-standing  
123 problem of improving estimates for the foveal CMF ( $M_0$ ). Another issue addressed there are  
124 attempts to become independent of the retinotopic centre's location. That centre's exact  
125 location appears to be difficult to find (it is often specified only approximately), and some  
126 authors like to use some other reference location instead. It turns out, however, that while  
127 equations can be referenced to some other location than the centre, true independence  
128 from the latter cannot be achieved by any means.

129 In the context of these derivations, I propose a new metric,  $d_2$ , measured in millimetres, for  
130 characterizing the cortical map. It is the equivalent of  $E_2$  (which is measured in degrees visual  
131 angle). Like  $E_2$  in the visual field,  $d_2$  allows specifying the steepness of location change in the  
132 cortical map, e.g. for quantifying the horizontal-vertical anisotropy or even for comparisons  
133 between species.

134 In another section, it is further argued that the simplified version ( $x \propto \log E$ ) that is not  
135 uncommon in the fMRI literature needs to be avoided and that the full version with a  
136 constant term added in *the log's argument* needs to be employed (i.e.,  $x \propto \log (E + c)$ ). There  
137 is further apparently confusion about what does and what does not represent the required  
138 constant term, which adds to a common myth that omitting the term simplifies matters.

139 Finally, the cortical location function can be used, perhaps unexpectedly, to derive the  
140 cortical distances in visual crowding. Crowding happens when neighbouring patterns to a  
141 target stimulus are closer than a critical distance; that critical distance can be described by  
142 Bouma's law (Bouma, 1970; Strasburger, Harvey, & Rentschler, 1991; Pelli, Palomares, &  
143 Majaj, 2004; Pelli & Tillman, 2008; Whitney & Levi, 2011; Strasburger, 2020). We thus arrive  
144 at a cortical version of Bouma's law. While this has been done before (Levi et al., 1985;  
145 Motter & Simoni, 2007; Pelli, 2008; Nandy & Tjan, 2012; Strasburger, Rentschler, & Jüttner,  
146 2011; Strasburger & Malania, 2013), the present derivations go beyond those in that they  
147 include the fovea and provide the derivations.

## 148 **1. Concepts**

149 Peripheral vision is unlike central vision as Ptolemy (90–168) already noted. Yet just how it is  
150 different is still a puzzling question. The goal here is to draw the attention to the highly  
151 systematic organization of the early neural processing stages by deriving equations that  
152 describe its architecture. But before doing so we need to be explicit on a number of  
153 concepts that are the foundation for what follows.

154 *The linear law and the hyperbola graph.* Four types of analytic functions are central for  
155 describing functional dependencies on eccentricity – in the visual field or in retinotopic  
156 areas: linear and inverse-linear, and logarithmic and exponential. Their graphs look entirely  
157 different (giving rise to misleading intuition; Rosenholtz, 2016, Strasburger, 2020) yet the  
158 first two and second two are effectively equivalent to each other. Let's start with the first  
159 pair (the second pair follows in Figure 3).

160 Aubert and Foerster's (1857) characterization of the performance decline with retinal  
161 eccentricity as a linear increase of minimum resolvable size – sometimes referred to as the  
162 Aubert-Foerster law – is still the conceptual standard. It corresponds to what is now called  
163 *M-scaling* when based on cortical magnification (Virsu & Rovamo, 1979; Virsu et al., 1987) or  
164 the change of *local spatial scale* when the scaling factor is not thus constrained (Watson,  
165 1987). Examples for the linear law are shown in Figure 1A and 2A. However, by the end of  
166 the 19<sup>th</sup> century it also became popular to use the inverse of minimum size instead, i.e.  
167 acuity, in an attempt to make the sensory decline more graphic (e.g. Fick, 1898, shown in  
168 Figure 1B). And, since the inverse-linear function's graph is close to a hyperbola, we arrive at  
169 the well-known hyperbola-like function of, e.g., acuity vs. eccentricity seen in most  
170 textbooks, or in Østerberg's (1935) equally well-known cone-density graph. Examples of that  
171 graph for the cortical map are in Dougherty et al. (2003, Fig. 5) and Harvey & Dumoulin  
172 (2011, Fig. 4B), shown in Figure 1 C and D.

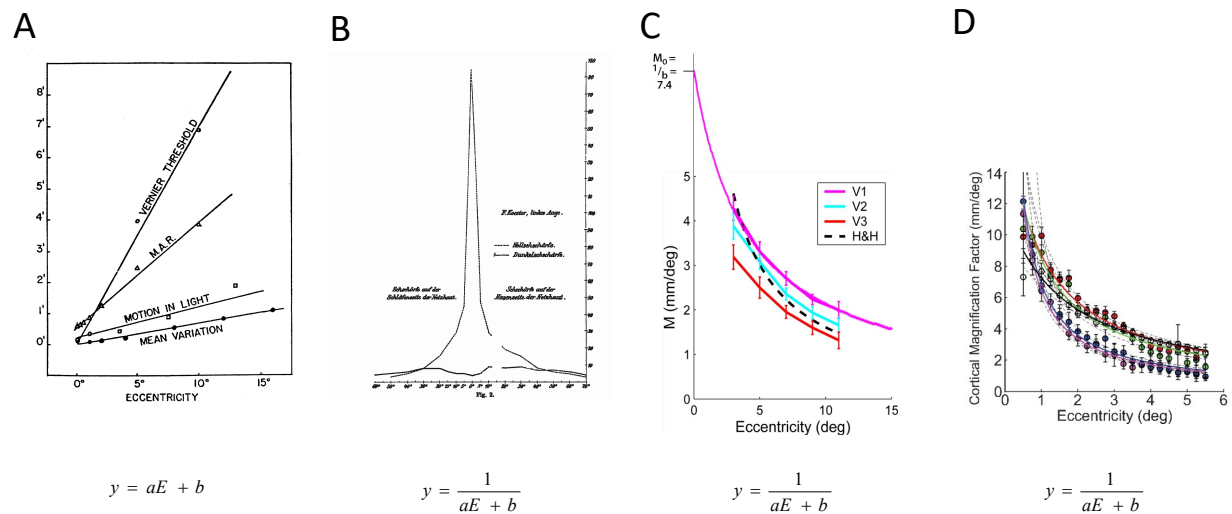

Figure 1. Examples for the linear and the inverse-linear (approx. hyperbola) graph. Even though the two are equivalent, their intuitive interpretation is often different, with the linear graph taken as evidence of a shallow performance decline and the inverse-linear graph as evidence of a steep decline (Rosenholtz, 2016; Strasburger 2020). A. MAR for various visual performance parameters; Weymouth (1958, Fig. 13). B. Visual acuity; Fick (1898, Fig. 2). C. Cortical magnification factor  $M$ ; Dougherty et al. (2003, Fig. 5). A hyperbola graph, obtained from linear regression to the inverse data ( $M=1/(0.033E+0.1355)$ ), and an axis intercept  $M_0=1/b$  have been added to the original graph. D. Same; Harvey & Dumoulin, 2011, Fig. 4B. In C and D note the steep incline toward the retinotopic centre and that no data are obtained in or near the centre. The central value  $M_0$  is therefore difficult to derive directly from those graphs.

173 Yet, graphic as it may be, the hyperbola graph does not lend itself to a comparison of decline  
 174 parameters. Weymouth (1958) therefore already argued for using the linear graph,  
 175 introducing the concept of the *minimal angle of resolution* (MAR) as a general measure of  
 176 size threshold. Weymouth summarized how the MAR and other spatial visual performance  
 177 parameters depend on retinal eccentricity (Figure 1A). Importantly, Weymouth stressed the  
 178 *mandatory use* of a non-zero, *positive y-axis intercept* for these functions (Weymouth, 1958,  
 179 p. 109). This will be a major point here in the paper; it is related to the necessity of a  
 180 constant term in the cortical-location function as discussed below.

181 *Cortical magnification.* Daniel & Whitteridge (1961) and Cowey & Rolls (1974) introduced  
 182 cortical magnification as a quantitative concept for retinotopic mapping, which, for a given  
 183 visual-field location, summarizes functional density along the retino-cortical pathway into a  
 184 single number. The linear cortical magnification factor (CMF),  $M$ , was defined as the  
 185 *diameter in the primary visual cortex onto which 1 deg of the visual field projects (areal  $M$*   
 186 *was defined as an areal counterpart). Enlarging peripherally presented stimuli by  $M$  turns*  
 187 *out to counter performance decline to a large degree for many visual tasks (reviewed, e.g.,*  
 188 *by Virsu et al., 1987); it was thus suggested as a general means of equalizing visual*  
 189 *performance across the visual field (Rovamo & Virsu, 1979). Even though this so-called*  
 190 *strong hypothesis was soon dismissed (e.g. Westheimer, 1982, p. 161), the strong tie*  
 191 *between cortical distances and (in particular) low-level psychophysical tasks is still striking.*

192 The relationship between the early visual architecture and psychophysical tasks is still a  
 193 matter of debate; why, for example, do different visual tasks show widely differing slopes of  
 194 their eccentricity functions (Figure 1A)? In contrast, the manner in which the CMF varies  
 195 with eccentricity is largely agreed upon:  $M$  decreases with eccentricity – following

196 approximately a hyperbola (Figure 1C and D) – and its inverse increases linearly (Schwartz,  
 197 1980; Van Essen et al., 1984; Tolhurst & Ling, 1988; Horton & Hoyt, 1991, Slotnick, Klein,  
 198 Carney, & Sutter, 2001, Duncan & Boynton, 2003; Larsson & Heeger, 2006; Schira, Wade, &  
 199 Tyler, 2007). Figure 2A shows a few examples for the latter. Note that in the figure there is  
 200 one function from psychophysics shown along with the anatomical estimates (Rovamo &  
 201 Virsu, 1979; Virsu & Rovamo, 1979; Virsu et al., 1987). Note also that all functions need to  
 202 have a positive y-axis intercept, *be it ever so slight*, because otherwise  $M$  were undefined,  
 203 i.e., infinite.

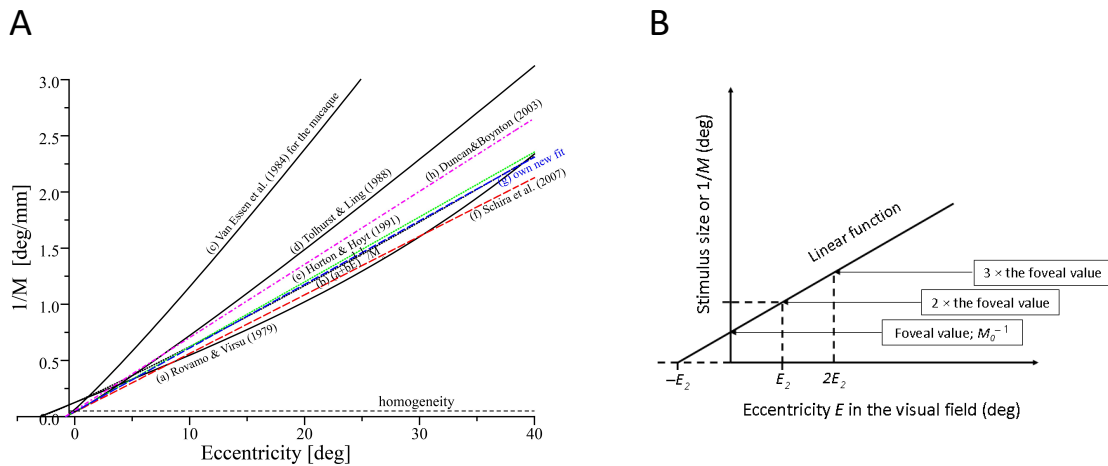

Figure 2. A. The inverse of the cortical magnification factor or, equivalently, the size of a patch in the visual field that projects onto a patch of constant size in the cortex, as a function of eccentricity in the visual field (Fig. 9 in Strasburger et al., 2011, reproduced for illustrating the text). All functions show a mostly linear behaviour. Their slope is quite similar, with the exception of Van Essen et al.'s (1984) data for the macaque; other data show similar slopes between human and monkey (e.g. Oehler, 1985). Note that Rovamo & Virsu's function is based on psychophysical data. Note also that all functions need to have a positive y-axis intercept. B. An illustration of the  $E_2$  concept.  $E_2$  is defined as the eccentricity where the foveal value doubles, or (equivalently) as the eccentricity increment that leads to an increment by the foveal value. It is also the negative x-axis intercept. Note that the foveal value does not double every  $E_2$  increment (cf. Strasburger, 2020). Importantly, note that the concept can be used for both psychophysical and anatomical data.

204 *Other equations:* Empirical data typically fit the linear concept quite well in the considered  
 205 range of about 40° eccentricity, but, nevertheless, fits can sometimes be improved by  
 206 introducing a slight nonlinearity (Table 1). Rovamo, Virsu, & Näsänen (1978), as an example,  
 207 used a polynomial by adding a small 3<sup>rd</sup>-order term; Van Essen et al. (1984), Tolhurst & Ling  
 208 (1988), and Sereno et al. (1995) increased the exponent of the linear term slightly above 1.  
 209 Virsu & Hari (1996) used a sine function, based on geometrical considerations. Only a part of  
 210 the sine's period comes into play so that the function is still close to linear in that range. The  
 211 latter function is interesting because it is the only one that can be extended to eccentricities  
 212 larger than 90°(cf. Strasburger, 2020). However, improvements over a linear approach are  
 213 mostly small or absent and do not warrant the added complexity in the derivations to follow,  
 214 so we will not pursue this further.

| Equation                                  | Source                                                                                                               | Comments                                                   |
|-------------------------------------------|----------------------------------------------------------------------------------------------------------------------|------------------------------------------------------------|
| $M^{-1} = M_0^{-1} \cdot (1 + aE)$        | Cowey & Rolls (1974)<br>(data from Wertheim, 1894)<br>Schira et al., 2010<br>Harvey & Dumoulin, 2011                 | Inverse-linear equation                                    |
| $M^{-1} = M_0^{-1} \cdot (1 + E/E_2)$     | Levi et al. (1985, Table 1)<br>Klein & Levi (1987)<br>Horton & Hoyt (1991)<br>Dougherty et al. (2003)                | Inverse-linear equation using $E_2$ .                      |
| $M^{-1} = M_0^{-1} \cdot (1 + aE + bE^3)$ | Rovamo & Virsu (1979)                                                                                                | Nonlinearity by an added small 3 <sup>rd</sup> -order term |
| $M^{-1} = M_0^{-1} \cdot (1 + aE)^\alpha$ | Van Essen et al. (1984), $\alpha=1.1$<br>Tolhurst & Ling (1988), $\alpha=1.1$<br>Serenio et al (1995), $\alpha=1.26$ | Non-linearity by an added exponent $\alpha$ close to 1     |
| $M^{-1} = a + b \sin(E)$                  | Virsu & Hari (1996),<br>Näsänen & O'Leary (2001)                                                                     | Only $1/8$ of the sine period is used                      |

215 Table 1. Equations used for describing eccentricity functions (modified from Strasburger et al., 2011).

216 *The  $E_2$  concept.* For a quick comparison of eccentricity functions, Levi et al. (1984, p. 794)  
 217 introduced the  $E_2$  concept by pointing out the specific eccentricity at which the respective  
 218 foveal value doubles (Figure 2B). More generally,  $E_2$  is the *eccentricity increment* at which  $y$   
 219 increases by the foveal value. I.e., at eccentricity  $E_2$  the foveal value is doubled and at twice  
 220  $E_2$  is tripled. As a graphic aide,  $E_2$  is also the distance from the origin of where the linear  
 221 function crosses the eccentricity axis.

222  $E_2$  is most often used for psychophysical tasks but lends itself equally well for describing the  
 223 anatomical function (Levi et al., 1985, Table 1; Klein & Levi, 1987; Horton & Hoyt, 1991;  
 224 Dougherty et al., 2003). Eq. (1) states the corresponding equation.

$$225 \quad M^{-1}/M_0^{-1} = E/E_2 + 1. \quad (1)$$

226  $M^{-1}$  in that equation is measured in  $^\circ/\text{mm}$  (one might call it the retinal magnification factor:  
 227 it corresponds to the receptive field size of a cortical neuron on the retina).  $M_0^{-1}$  is that value  
 228 in the fovea's centre. The function's slope is given by  $M_0^{-1}/E_2$ , so when these functions are  
 229 normalized to the foveal value, their slope is  $1/E_2$ . I.e., larger  $E_2$  corresponds to shallower  
 230 slope. Parameter  $E_2$  thus captures an important property of the functions (how they  
 231 increase/decrease) in a single number. A summary of values was reported by Levi et al.  
 232 (1984), Levi et al. (1985), Klein & Levi (1987), or more recently by Strasburger et al. (2011,  
 233 Tables 4–6). These reported  $E_2$  values vary widely between different visual functions. They  
 234 also vary considerably for functions that seem directly comparable to each other (for  
 235 example,  $E_2$  for vernier acuity:  $0.62^\circ$ – $0.8^\circ$ ; for  $M^{-1}$ :  $0.77^\circ$ – $0.82^\circ$  or even  $3.67^\circ$  in Dougherty et  
 236 al., 2003; for Landolt-C acuity:  $1.0^\circ$ – $2.6^\circ$ ; letter acuity:  $2.3^\circ$ – $3.3^\circ$ ; gratings:  $2.5^\circ$ – $3.0^\circ$ ). On the  
 237 other hand,  $E_2$  can also be surprisingly similar for tasks that seem entirely unrelated, like for  
 238 example the  $E_2$  of  $1.22^\circ$  for the perceived travel extent in the fine-grain movement illusion  
 239 (Foster, Thorson, McIlwain, & Biederman-Thorson, 1981). Note also the limitations of  $E_2$ :  
 240 since, for example, the empirical functions always deviate a little from linearity, the  
 241 characterization by  $E_2$ , by its definition, works best at small eccentricities.

242 *M-scaling and local scale:* The left hand ratio in eq. (1),  $M^{-1}/M_0^{-1}$ , is the ratio by which a  
 243 peripherally seen stimulus needs to be size-scaled to occupy cortical space equal to a foveal  
 244 stimulus. So the equation can be re-written as

245  $S/S_0 = E/E_2 + 1,$  (2)

246 where  $S$  is *scaled size* and  $S_0$  is the size at the fovea's centre.  $S_0$  can be considered the size-  
247 scaling unit in the visual field, and  $E_2$  the locational scaling unit (i.e. the unit in which scaled  
248 eccentricities are measured). If  $E_2$  refers to the cortical map, this is the *concept of M-scaling*.  
249 If  $E_2$  in the equation refers to some other eccentricity function, this corresponds to a more  
250 abstract way of size scaling, called *local scale* (Watson, 1987).

251 *The cortical location function:* Fischer (1973) and Schwartz (1977, 1980) proposed the  
252 complex log function for mapping the visual field to the cortical area. The key property of  
253 interest for that mapping is the behaviour *along a radius* (from the fovea) in the visual field;  
254 the simpler real-valued log function can thus be used instead of the complex logarithm. This,  
255 then, maps the eccentricity in the visual field to the distance from the retinotopic centre on  
256 the cortical map (Figure 3B). Neuroscience papers often prefer to show the inverse function  
257 (i.e. mirrored along the diagonal with the x and y axis interchanged, thus going "backwards"  
258 from cortical distance to eccentricity), which is the exponential function shown schematically  
259 in Figure 3A.

260 *The constant term:* Schwartz (1980) has discussed two versions of the function that differ in  
261 whether there is a constant term added in the argument; the difference is illustrated in the  
262 graph. The version without the constant is often considered simpler and is thus often  
263 (inappropriately) preferred. A point in the following will be that that simplicity is deceiving  
264 and can lead to wrong conclusions – and more complicated equations. Note that the  
265 constant term is at different places in the equations: For the exponential function in figure  
266 part (A) it is *added to* the exponential, for the logarithmic function in (B) it is *within* the log's  
267 argument. As will be seen later, the constant term in both cases corresponds to the positive  
268 y-intercept of the linear function (Figure 2B).



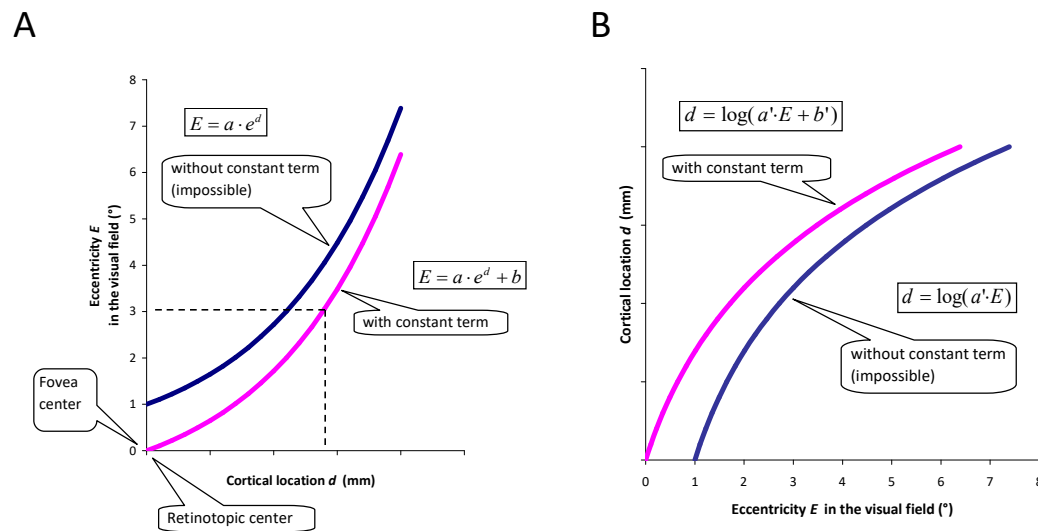

Figure 3. Schematic graph of the cortical location function introduced by Fischer (1973) and Schwartz (1977, 1980), along a radius from the retinotopic centre. A version with, and another without a constant term (parameter  $b$  or  $b'$  in the equation) are shown. The constant term's omission was intended as a simplification for large eccentricities but is not physically possible near or in the foveal centre. The graph in (A) shows eccentricity  $E$  as a function of cortical distance  $d$  (which is an exponential); Schwartz (1980) discussed mainly the inverse function shown in (B), i.e. for  $d$  as a function of  $E$  (which is logarithmic).

269 *The retinal and the retinotopic centre:* There is an important difference in difficulty between  
 270 measuring at the fovea's exact centre and at the cortical retinotopic counterpart. Whereas  
 271 psychophysical measurements at the fovea are particularly simple and reliable, determining  
 272 the exact retinotopic centre and the CMF at that location,  $M_0$ , appear the most difficult and  
 273  $M_0$ 's value is mostly extrapolated from peripheral values. The consequences of this include  
 274 different strategies in research between the two fields regarding the map.

275 *Anisotropy.* The visual field is not isotropic: Performance declines differently between radii.  
 276 Slopes differ between vertical and horizontal, and upper vs lower field. Accordingly, iso-  
 277 performance lines (for the binocular field) are distorted ellipses rather than circular outside  
 278 the central visual field, which is isotropic (e.g. Wertheim, 1894, Harvey & Pöppel, 1972;  
 279 Pöppel & Harvey, 1973). Rovamo & Virsu (1979, p. 498) accordingly computed separate  $M$   
 280 estimates for each meridian. There is further a nonlinearity at the transition from the  
 281 isotropic to the anisotropic field (Pöppel & Harvey, 1973, Fig. 6). Correspondingly, early  
 282 visual areas are also anisotropic (e.g. Horton & Hoyt, 1991). The effect of anisotropy on the  
 283 cortical magnification factor is quantitatively treated by Schira et al. (2007, 2010); their  $M_0$   
 284 estimate is the geometric mean of the isopolar and isoeccentric  $M$  estimates. In the  
 285 equations presented below, the horizontal/vertical anisotropy can be accommodated by  
 286 letting the parameters depend on the radius in question. There are further anisotropies that  
 287 are not accounted for by varying slopes along the radii (Schira et al., 2007, 2010). These  
 288 authors, for preserving *area* constancy across meridians, thus extend modelling by a shear  
 289 function (using the hyperbolic secans; Schira et al., 2010, eq. 6 and Fig. 2). Mappings then  
 290 differ between meridians, with deviations from linearity most noticeable on, and close to,  
 291 the vertical meridian at around  $1^\circ$  eccentricity (Schira et al., 2010, Fig. 2). The derivations  
 292 presented below, for simplicity, do not include these refinements.

293 *Symbols in the paper:* To keep the overview, symbols used in the paper are summarized in  
 294 Table 2. Some of those are in standard use and some are newly introduced in the remainder.

295

|                                                   | Visual Field | Cortical Map |
|---------------------------------------------------|--------------|--------------|
| Cortical magnification factor                     | $M^{-1}$     | $M$          |
| Stimulus size                                     | $S$          | –            |
| Location as distance from the centre              | $E$          | $d$          |
| Location as distance from a reference             | –            | $\hat{d}$    |
| Levi and Klein's $E_2$                            | $E_2$        | $d_2$        |
| Location of reference as distance from the centre | –            | $d_{ref}$    |
| Critical distance for crowding                    | $\delta$     | $\kappa$     |
| Critical distance for crowding in the very centre | $\delta_0$   | $\kappa_0$   |
| $E_2$ for critical crowding distance              | $\hat{E}_2$  | –            |

296 Table 2. Summary of symbols used in the paper

## 297 2. The cortical location function

### 298 2.1 Cortical location specified relative to the retinotopic centre

299 The ratio  $S/S_0$  in eq. (2) is readily estimated in psychophysical experiments as the size of a  
 300 stimulus relative to its foveal value for achieving equal perceptual performance. However, its  
 301 physiological counterpart  $M^{-1}/M_0^{-1}$  in eq. (1) appears difficult to assess directly, even though  
 302 it is a physiological concept. Instead, it is typically derived by extrapolation from peripheral  
 303 values, e.g. from the cortical-location function  $d = d(E)$  (Figure 3). The function links a cortical  
 304 distance  $d$  in a retinotopic area to the corresponding distance in the visual field that it  
 305 represents. More specifically,  $d$  is the distance (in mm) on the cortical surface between the  
 306 representation of a visual-field point at eccentricity  $E$ , and the representation of the fovea  
 307 centre. Under the assumption of linearity of the cortical magnification function  $M^{-1}(E)$ , this  
 308 function is logarithmic (Figure 3B) and its inverse  $E = E(d)$  exponential (Figure 3A), as shown  
 309 by Fischer (1973) and Schwartz (1977, 1980). Since the  $E_2$  parameter allows a simple  
 310 formulation of the linear eccentricity functions (Figure 2), as e.g. in eq. (1), it will be useful to  
 311 state the location function with those notations. First steps have been derived in Strasburger  
 312 et. al. (2011, eqs. 10 – 13; corresponding here eqs. 3 – 6). The present derivations go further.  
 313 The location function allows a concise quantitative characterization of the early retinotopic  
 314 maps.

315 For its derivation, notice first that, locally, the cortical distance of the respective  
 316 representations  $d(E)$  and  $d(E+\Delta E)$  of two nearby points along a radius, at eccentricities  $E$  and  
 317  $E+\Delta E$ , is given by  $M(E) \cdot \Delta E$ . This follows from  $M$ 's definition and the fact that  $M$  refers to  $1^\circ$ .  
 318 The cortical magnification factor  $M$  is thus the first derivative of  $d(E)$ , i.e.,

$$319 \quad M = d'(E). \quad (3)$$

320 Conversely, the location  $d$  on the cortical surface (i.e., the global aspect) is the integral over  
 321  $M$ , starting at the fovea centre:

$$322 \quad d(E) = \int_0^E M(E) dE. \quad (4)$$

323 If we insert eq. (1) – i.e. the equation using  $E_2$  – into eq. (4), we have

$$\begin{aligned}
 324 \quad d(E) &= \int_0^E \frac{M_0}{1 + E/E_2} dE \\
 325 \quad &= M_0 E_2 \ln(1 + E/E_2) \text{ (with } E \geq 0), \tag{5}
 \end{aligned}$$

326 where  $\ln$  denotes the natural logarithm.

327 The inverse function,  $E(d)$  is derived by inverting eq. (5),

$$328 \quad E = E_2(e^{\frac{d}{M_0 E_2}} - 1) \text{ (with } d \geq 0). \tag{6}$$

329 It states how the eccentricity  $E$  in the visual field depends on the distance  $d$  of the  
 330 corresponding location in a retinotopic area from the retinotopic centre. With slight  
 331 variations, discussed below, it is the formulation often referenced in fMRI papers on the  
 332 cortical mapping. Note that, by its nature, it is only meaningful for positive values of cortical  
 333 distance  $d$ . The significance of this point will become apparent later.

334 We can simplify that function further by introducing an analogue to  $E_2$  in the cortex. Observe  
 335 that like any point in the visual field the location at  $E_2$  has a representation (on the meridian  
 336 in question), whose distance from the retinotopic centre we denote as  $d_2$ . Thus,  $d_2$  in the  
 337 cortex represents  $E_2$  in the visual field.

338 To express eq. (6) using  $d_2$  instead of  $M_0$ , first apply the equation to that location  $d_2$ :

$$339 \quad E_2 = E_2(e^{\frac{d_2}{M_0 E_2}} - 1) . \tag{7}$$

340 Solving that for the product  $M_0 E_2$  gives

$$341 \quad M_0 E_2 = d_2 / \ln 2 , \tag{8}$$

342 which, inserted into eq. (6) in turn gives

$$343 \quad \boxed{E = E_2(2^{d/d_2} - 1)} . \tag{9}$$

344 Eq. (9) is the most concise way of stating the cortical location function. We can also restate it  
 345 however as

$$346 \quad \boxed{E = E_2(e^{(\ln 2)d/d_2} - 1)} \tag{10}$$

347 since the exponential to the base e is often more convenient ( $\ln$  again denotes the natural  
 348 logarithm).

349 This equation (eq. 10) is particularly nice and simple provided that  $d_2$ , the cortical equivalent  
 350 of  $E_2$ , is known. That value,  $d_2$ , could thus play a key role in characterizing the cortical map,  
 351 similar to the role of  $E_2$  in visual psychophysics (cf. Table 4 – Table 6 in Strasburger et al.,  
 352 2011, or earlier the tables in Levi et al., 1984, Levi et al., 1985, or Klein & Levi, 1987).

353 Estimates for  $d_2$  derived from literature data are summarized in Section 2.4 below, as an aid  
 354 for concisely formulating the cortical location function.

355 The new cortical parameter  $d_2$  can be calculated from eq. (8), restated here for convenience:

$$356 \quad \boxed{d_2 = M_0 E_2 \ln 2} \tag{8a}$$

## 357 2.2 Cortical location specified relative to a reference location

358 Implicit in the definition of  $d$  or  $d_2$  is the knowledge about the location of the fovea centre's  
359 cortical representation, i.e. of the retinotopic centre. That locus has proven to be hard to  
360 determine precisely, However, and instead of the centre it has thus become customary to  
361 use some fixed eccentricity  $E_{ref}$  as a reference. Engel et al. (1997, Fig. 9; 1994, Fig. 2), for  
362 example, use  $E_{ref} = 10^\circ$ . Larsson & Heeger (2006, Fig. 5) use  $E_{ref} = 3^\circ$ .

363 To restate eq. (6) or (10) accordingly, i.e. with some reference eccentricity different from  
364  $E_{ref} = 0$ , we first apply eq. (10) to that reference:

$$365 \quad E_{ref} = E_2(e^{(\ln 2)d_{ref}/d_2} - 1), \quad (11)$$

366 where  $d_{ref}$  denotes the value of  $d$  at the chosen reference eccentricity, e.g. at  $3^\circ$  or  $10^\circ$ .

367 Solving then that equation for  $d_2$  and plugging the result into eq. (9) or (10), we arrive at

$$368 \quad E = E_2\left(\left(\frac{E_{ref}}{E_2} + 1\right)^{d/d_{ref}} - 1\right). \quad (12)$$

369 Expressed to the base e instead, we have

$$370 \quad \boxed{E = E_2(e^{\beta(d/d_{ref})} - 1), \text{ with } \beta = \ln\left(\frac{E_{ref}}{E_2} + 1\right) \text{ (and } d \geq 0),} \quad (13)$$

371 which represents the location function expressed *relative to a reference eccentricity*  $E_{ref}$ , and  
372 its equivalent in the cortical map,  $d_{ref}$ . (One could also derive eq. (13) directly from eq. (6).)  
373 Note that if, in that equation,  $E_2$  is taken as the reference eccentricity for checking, it reduces  
374 to eq. (10) as expected. So,  $E_2$  can be considered as a special case of a reference eccentricity.  
375 Note further that, unlike the location equations often used in the retinotopy literature (Van  
376 Essen et al., 1984, in the introduction; Duncan & Boynton, 2003; Larsson & Heeger, 2006),  
377 the equations are well defined in the fovea centre: for  $d = 0$ , the eccentricity  $E$  is zero, as it  
378 should.

379 What reference to choose is up to the experimenter. However, the fovea centre itself cannot  
380 be used as a reference eccentricity – the equation is undefined for  $d_{ref} = 0$  (since the  
381 exponent is then infinite). Thus, the desired independence of knowing the retinotopic  
382 centre's location has not been achieved – that knowledge is still needed, since  $d$ , and  $d_{ref}$ , in  
383 these equations are defined as the respective distances from that point.

384 Equations (12) and (13) have the ratio  $d/d_{ref}$  in the exponent. It is a proportionality factor for  
385 cortical distance. From the intercept theorem in geometry we know that this factor cannot  
386 be re-expressed by any other expression that leaves the zero point undefined. True  
387 independence from knowing the retinotopic centre, though desirable, thus cannot be  
388 achieved.

389 We can nevertheless shift the coordinate system such that locations are specified relative to  
390 the reference location,  $d_{ref}$ . For this, we define a new variable  $\hat{d}$  as the cortical distance (in  
391 mm) from the reference  $d_{ref}$  instead of from the retinotopic centre (see Figure 4 for an  
392 illustration for the shift and the involved parameters), where  $d_{ref}$  is the location  
393 corresponding to some eccentricity,  $E_{ref}$ . By definition, then,

$$394 \quad \hat{d} = d - d_{ref} \quad (14)$$

395

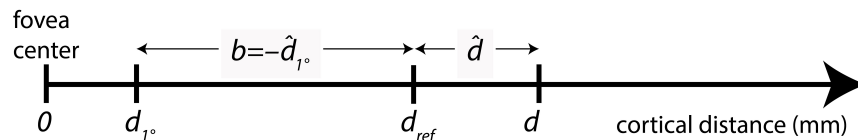

Figure 4: Illustration of the cortical distance measures used in equations (6) – (23), and of parameter  $b$  in eq. (18) further below.

$d$  – cortical distance of some location from the retinotopic centre, in mm;

$d_{ref}$  – distance (from the centre) of the reference that corresponds to  $E_{ref}$ ;

$d_{1^\circ}$  – distance of the location that corresponds to  $E = 1^\circ$ ;

$\hat{d}$  – distance of location  $d$  from the reference  $d_{ref}$ .

396 In the shifted system – i.e., with  $\hat{d}$  instead of  $d$  as the independent variable – eq. (6) for  
397 example becomes

$$398 \quad E = E_2 \left( e^{\frac{\hat{d} + d_{ref}}{M_0 E_2}} - 1 \right). \quad (15)$$

399 The equation might be of limited practical use, however (like eq. 6 from which it was  
400 derived), since the parameters  $M_0$  and  $E_2$  in it are not independent; they are inversely  
401 related to each other as seen in eq. (8) or (8a) (or eq. 17). That interdependency is removed  
402 in eq. (9) or (10), (which work from the retinotopic centre), or eq. (13) (which used a  
403 reference eccentricity). The latter (eq. 13), in the shifted system becomes

$$404 \quad E = E_2 \left( e^{\beta \frac{\hat{d} + d_{ref}}{d_{ref}}} - 1 \right), \text{ with } \beta = \ln\left(\frac{E_{ref}}{E_2} + 1\right) \text{ (and } \hat{d} + d_{ref} \geq 0 \text{)}. \quad (16)$$

405 That equation now has the advantage over eq. (15) of having only two free parameters,  $E_2$   
406 and  $d_{ref}$ . ( $E_{ref}$  is not truly free since it is empirically linked to  $d_{ref}$ .) The foveal magnification  
407 factor  $M_0$  has dropped from the equation. Indeed, by comparing eq. (13) to eq. (6) (or by  
408 comparing eq. (15) to (16)),  $M_0$  can be calculated from  $d_{ref}$  and  $E_2$  as

$$409 \quad M_0 = \frac{d_{ref}}{\beta \cdot E_2}, \quad (17)$$

410 where  $\beta$  is defined as in the previous equation. With an approximate location of the  
411 retinotopic centre (needed for calculating  $d_{ref}$ ) and an estimate of  $E_2$ , that latter equation  
412 leads to an estimate of the foveal magnification factor,  $M_0$  (see Section 2.4 for examples).

413 Equations (16) and (17) are crucial to determining the retinotopic map in early areas. They  
414 should work well for areas V1 to V4 as discussed below. The connection between the linear  
415 and log or exponential function based estimations provided by these equations allows cross-  
416 validating the empirically found parameters and thus leads to more reliable results. Duncan  
417 & Boynton (2003), for example, review the linear law and also determine the cortical  
418 location function empirically but do not draw the connection. Their's and others' approaches  
419 are discussed as practical examples in the section after next (Section 2.4).

### 420 2.3 Independence from the retinotopic centre with the simplified function?

421 Schwartz (1980) had offered a simplified location function where the constant term is  
422 omitted, which works at sufficiently large eccentricities. Frequently that was the preferred

423 one by other authors as seemingly being more practical. The present section briefly  
424 highlights how this approach leads astray if pursued rigorously.

425 The simplified version of the location function  $E(\hat{d})$  omits the constant term in eq. (6) and  
426 those that follow from it (i.e., the “-1” in eq. 6 up to eq. 16). Instead, the equation

$$427 \quad E = e^{a(\hat{d}+b)} \quad (18)$$

428 is fit to the empirical data, with free parameters  $a$  and  $b$ . The distance variable in it is  $\hat{d}$  as  
429 before, i.e., the cortical distance from a reference  $d_{ref}$  representing some eccentricity  $E_{ref}$  in  
430 the visual field. Engel et al. (1997, Fig. 9; 1994, Fig. 2), for example, use  $E_{ref} = 10^\circ$  for such a  
431 reference, and for that condition report the equation  $E = \exp(0.063(\hat{d} + 36.54))$ . Larsson &  
432 Heeger (2006, Fig. 5), as another example, use  $E_{ref} = 3^\circ$ , and for area V1 in that figure give the  
433 function  $E = \exp(0.0577(\hat{d} + 18.0))$ . Note that neither of these equations contains the  
434 required constant term (cf. Figure 3), since the constants (36.54 and 18.0) are inside, not  
435 outside the exponential’s argument.

436 We can attach meaning to the parameters  $a$  and  $b$  in eq. (18) by constraining the function  
437 appropriately (see Strasburger, 2019, for the derivation). By that we arrive at an equation

$$438 \quad E = E_{ref} \cdot (E_{ref}^{-\hat{d}/\hat{d}_1^\circ}), \quad (19)$$

439 where  $\hat{d}_1^\circ$  is the distance of the  $1^\circ$  line from the reference eccentricity’s representation; it is  
440 around  $-36.5$  mm for  $E_{ref} = 10^\circ$  as used by Engel et al. (1994, 1997).

441 This is now the *simplified* cortical location function, i.e. the simplified analogue to eq. (16),  
442 with parameters spelt out. One can easily verify that the equation holds true at the two  
443 defining points, i.e. at  $1^\circ$  and the reference eccentricity. Note also that, as intended, knowing  
444 the retinotopic centre’s location in the cortex is not required since  $\hat{d}$  is defined relative to a  
445 non-zero reference. However, in between these two points the function has the wrong  
446 curvature (see Fig. 4 in the next section, fat black line). Importantly, however, the equation  
447 fails with small eccentricities, for the simple reason that  $E$  cannot become zero in that  
448 equation. In other words, the fovea’s centre is never reached, even at the retinotopic centre.

449 So the seeming simplicity of eq. (18) that we started out from leads astray in and around the  
450 fovea – which, after all, is of prime importance for vision. The next section illustrates the  
451 impact of the constant term with data from the literature.

## 452 **2.4 Practical use of the equations: examples**

### 453 **2.4.1 The approach of Larsson & Heeger (2006)**

454 Now that we have derived two sets of equations for the location function (i.e. with, and  
455 without, a constant term in Section 2.1 and 2.3, respectively) let us illustrate the difference  
456 with data on the cortical map. The first example are data from Larsson & Heeger (2006,  
457 Fig. 5) for area V1. As a reminder, this is about eq. (16) on the one hand – in  
458 essence  $E = a(e^{b\hat{d}} - 1)$ , derived from eq. (6) – and the discouraged eq. (18) or (19) on the  
459 other hand (in essence  $E = ae^{b\hat{d}}$ , i.e. no constant term outside the exponent – Larsson &  
460 Heeger’s constant ‘18.0’ *within* the exponent is part of the coefficient  $a$ ).

461 For the reasons explained above, the retinotopic centre is left undefined by Larsson &  
462 Heeger (2006), and a reference eccentricity of  $E_{ref} = 3^\circ$  is used instead. The fitted equation in  
463 the original graph in their paper is stated as  $E = \exp(0.0577(\hat{d}+18.0))$ , which corresponds to

464 eq. (18) with constants  $a = 0.0577$ , and  $b = -\hat{d}_{1^\circ} = 18.0$ . Its graph is shown in Figure 5 as the  
 465 thick black line copied from the original graph. It is continued to the left as a dotted blue line  
 466 to show the behaviour toward the retinotopic centre. At the value of  $\hat{d} = -b$ , i.e. at a distance  
 467 of  $\hat{d}_{1^\circ} = -18.0$  mm from the  $3^\circ$  representation (as seen from eq. 18 or 19), the line crosses the  
 468  $1^\circ$  point. To the left of that point, i.e. towards the retinotopic centre, the curve deviates  
 469 markedly upward and so the retinotopic centre ( $E = 0^\circ$ ) is never reached.

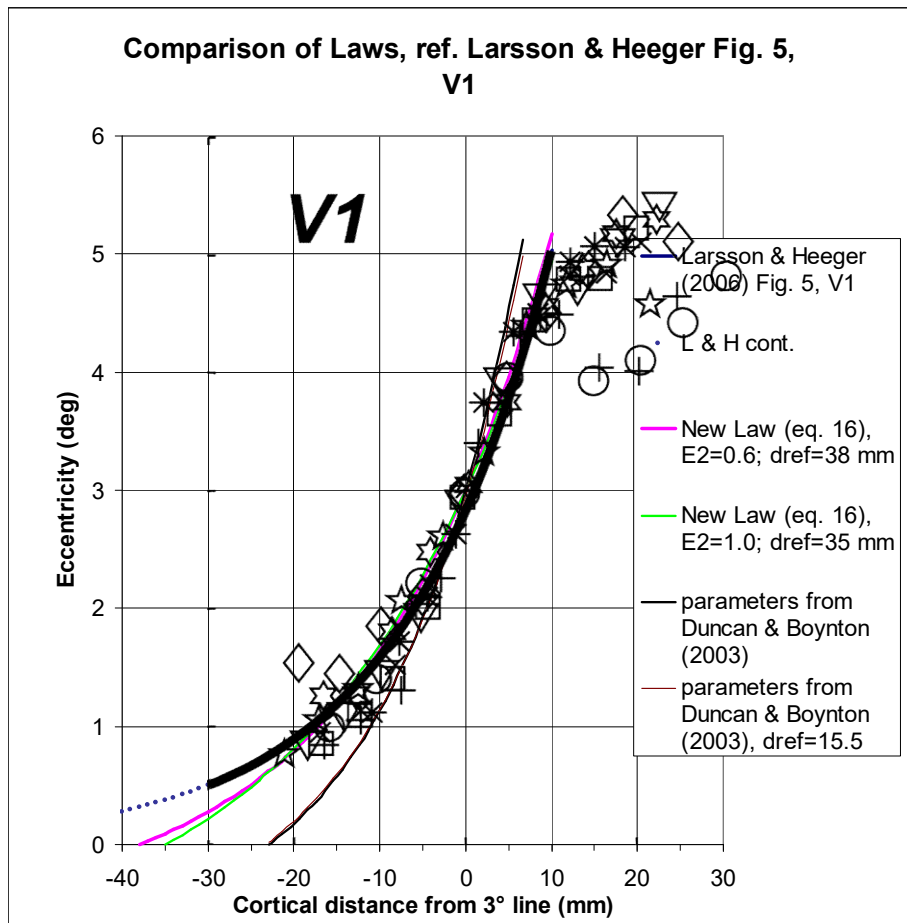

470

471 Figure 5. Comparison of conventional and improved analytic functions for describing the cortical location  
 472 function. Symbols show the retinotopic data for area V1 with reference location  $d_{ref} = 3^\circ$  from Larsson and  
 473 Heeger (2006, Fig. 5) (symbols for nine subjects). Superimposed is the original fit (thick black line), according  
 474 to eq. (18) ( $E = \exp(a(\hat{d} + b))$ ) or eq. (19), i.e. a fit without a constant term). The blue dotted line continues  
 475 that fit to lower eccentricities; the fitted  $E(\hat{d})$  function goes to (negative) infinite cortical distance, which is  
 476 physically meaningless. The pink and green line show graphs of the preferable eq. (16) that was derived  
 477 from integrating the inverse linear law (eq. 1). The equations are underconstrained if  $M_0$  is not known; two  
 478 pairs of parameter choices are shown, [ $E_2 = 0.6^\circ$ ,  $d_{ref} = 38$  mm] and [ $E_2 = 1.0^\circ$ ,  $d_{ref} = 35$  mm], respectively.  
 479 The corresponding retinotopic centre's magnification factor  $M_0$  can be calculated by eq. (17) as  $35.4$  mm/ $^\circ$   
 480 and  $25.3$  mm/ $^\circ$  for the two cases, respectively. Black and brown line:  $E(\hat{d})$  function with parameters derived  
 481 by Duncan & Boynton (2003),  $M_0 = 18.5$  mm/ $^\circ$  and  $E_2 = 0.831^\circ$  (black), and with  $d_{ref} = 15.5$  mm (brown)  
 482 for comparison (discussed in the next section). Note that, by definition, the curves from Larsson & Heeger pass  
 483 through the  $3^\circ$  point at  $\hat{d} = 0$  mm. Note also that, according to the authors, the data beyond  $\sim 10$  mm were  
 484 biased and can be disregarded.

485 The pink and the green curve in Figure 5 are two examples for a fit of the equation with a  
 486 constant term (i.e., for eq. 16). Note that the equations are underconstrained unless either  
 487 the location of the retinotopic centre or the central CMF  $M_0$  are known. The pink curve uses

488  $E_2 = 0.6^\circ$  and  $d_{ref} = 38$  mm, and the green curve  $E_2 = 1.0^\circ$  and  $d_{ref} = 35$  mm. Apparently,  
489 smaller  $E_2$  values go together with larger  $d_{ref}$  values for a similar shape. Within the range of  
490 the data set, the two curves fit about equally well; the pink curve is slightly more curved (a  
491 smaller  $E_2$  is accompanied by more curvature). Below about  $1^\circ$  eccentricity, i.e. around half  
492 way between the  $3^\circ$  point and the retinotopic centre, the two curves deviate markedly from  
493 the original fit. The new curves fit the data better there than the original and, in particular,  
494 reach a retinotopic centre. Of the two, the pink curve (with  $E_2 = 0.6^\circ$ ) reaches the centre at  
495 38 mm from the  $3^\circ$  point, and the green curve at 35 mm.

496 The centre cortical magnification factor,  $M_0$ , for the two curves can be derived from eq. (17),  
497 giving a value of  $35.4 \text{ mm}/^\circ$  and  $25.3 \text{ mm}/^\circ$ , respectively. These two estimates differ  
498 substantially from one another – by a factor of 1.4 – even though there is only a 3-mm  
499 difference of the assumed location of the retinotopic centre. This illustrates the large effect  
500 of the estimate for the centre's location on the foveal magnification factor,  $M_0$ . It also  
501 illustrates the importance of a good estimate for that location.

502 There is a graphic interpretation of the foveal magnification factor  $M_0$  in these graphs. From  
503 eq. (6) one can derive that  $M_0^{-1}$  is equal to the function's slope at the retinotopic centre.  
504 Thus, if the function starts more steeply (as does the green curve compared to the pink one),  
505  $M_0^{-1}$  is higher and thus  $M_0$  is smaller.

506 The figure also shows two additional curves (black and brown), depicting data from Duncan  
507 & Boynton (2003), which are discussed below. To better display the various curves' shapes,  
508 they are shown again in Figure 6 but now without the data symbols. Figure 6 also includes an  
509 additional graph, depicting the exponential function  $E = \exp(0.063(\hat{d} + 36.54))$  reported by  
510 Engel et al. (1994, 1997). In it,  $\hat{d}$  is again the cortical distance in millimetres but this time  
511 measured from the  $10^\circ$  representation.  $E$ , as before, is the visual field eccentricity in  
512 degrees. For comparison with the other curves, the curve is shifted (by 19.1 mm cortical  
513 distance) on the abscissa, to show the distance from the  $3^\circ$  point. The curve runs closely with  
514 that of Larsson & Heeger (2006) and shares its difficulties.



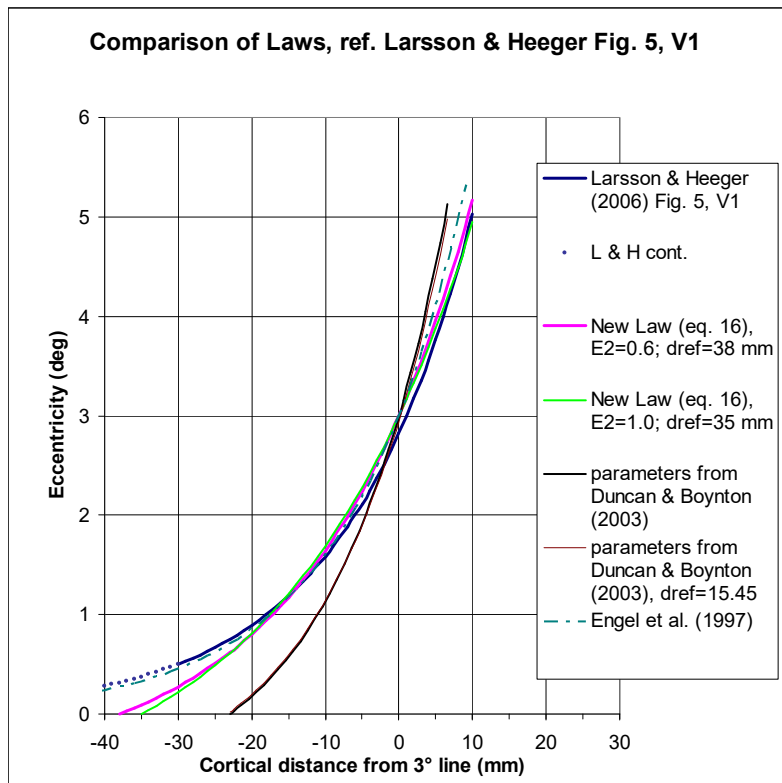

515

516 Figure 6. Same as Figure 5 but without the data symbols, for better visibility of the curves. The additional  
517 dash-dotted curve next to that of Larsson & Heeger's depicts the equation by Engel et al. (1997).

518

#### 519 2.4.2 The approach of Duncan & Boynton (2003)

520 In addition to the curves just discussed, Figure 5 and Figure 6 show a further  $E(\hat{d})$  function  
521 that is based on the results of Duncan & Boynton (2003). That function obviously differs  
522 quite a bit from the others in the figure and it is thus worthwhile studying how Duncan &  
523 Boynton (2003) derived these values. The paper takes a somewhat different approach for  
524 estimating the retinotopic mapping parameters for V1 than the one discussed before.

525 As a first step in Duncan & Boynton's paper, the locations of the lines of equal eccentricity  
526 are estimated for five eccentricities (1.5°, 3°, 6°, 9°, 12°) in the central visual field, using the  
527 equation  $w = k * \log(z + a)$ . The function looks similar to the ones discussed above, except  
528 that  $z$  is now a complex variable that mimics the visual field in the complex plane. On the  
529 horizontal half-meridian (where  $z$  is real-valued) that is equivalent to eq. (6) in the present  
530 paper, i.e., to an  $E(d)$  function that includes a constant term (here parameter  $a$ ) in the log's  
531 argument and with the retinotopic centre as the reference. At these locations, the authors  
532 then estimate the size of the projection of several 1°-patches of visual space (see their Fig.  
533 3; this is where they differ in their methodology from other approaches). By definition, these  
534 sizes are the cortical magnification factors  $M_i$  at the corresponding locations. Numerically,  
535 these sizes are then plotted vs. eccentricity in the paper's Fig. 4 (reproduced in Figure 7A).  
536 Note that this is not readily apparent from the paper, since both the graph and the  
537 accompanying figure caption state something different. In particular the y-axis is labelled  
538 incorrectly (as is evident from the accompanying text). For clarity, therefore, Figure 7B here  
539 plots these data with a corrected label and on a linear y-axis.

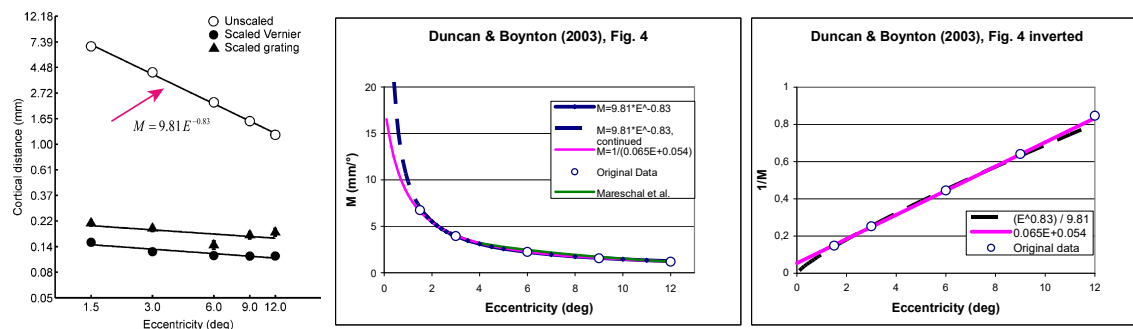

540  
541

542 Figure 7. Duncan & Boynton's (2003) Fig. 4, showing the cortical magnification factor's variation with  
 543 eccentricity. (A) Original Fig. 4. The open symbols follow a power function (note the double-linear  
 544 coordinates). (B) Redrawn on a linear y-axis and with a *corrected* y-axis label ( $M$  in  $\text{mm}/^\circ$ ). Open circles  
 545 show the original data. Note that the equation used in (A) and proposed earlier in the paper (p. 662),  
 546  $M = 9.81 * E^{-0.83}$ , predicts an *infinite* foveal magnification factor, shown as the blue curve (with blue  
 547 diamonds for visibility). In contrast, the inverse-linear fit  $M^{-1} = 0.065 E + 0.054$  proposed later in the paper  
 548 (p. 666) fits the data equally well in the measured range of  $1.5^\circ$  to  $12^\circ$  but in contrast predicts a reasonable  
 549 foveal magnification factor  $M_0$  of  $18.5 \text{ mm}/^\circ$ . The  $E_2$  value for the latter equation is  $E_2 = 0.83$ . The additional  
 550 green curve shows an equation by Mareschal et al. (2010) (see next section). (C) The inverse of the same  
 551 functions. Note the slight but important difference at  $0^\circ$  eccentricity, where the original curve is zero and its  
 552 inverse is thus undefined, whilst the linear function is *non-zero* and its inverse thus well-defined.

553 The authors next fit a power function to those data, stated as  $M = 9.81 * E^{-0.83}$  for the cortical  
 554 magnification factor (note the double-logarithmic coordinates in 7A). There is more  
 555 confusion, however, because it is said that, from such power functions, the foveal value can  
 556 be derived by extrapolating the fit to the fovea (p. 666). That cannot be the case, however,  
 557 since, by the definition of a power function (including those used in the paper), there is no  
 558 constant term. The function therefore goes to infinity towards the fovea centre, as shown in  
 559 Figure 7B (dashed line). Furthermore,  $E_2$ , which is said to be derived in this way in the paper,  
 560 cannot be derived from a nonlinear function (because the  $E_2$  concept requires a linear or  
 561 inverse-linear function). The puzzle is resolved with a reanalysis of Duncan & Boynton's Fig.  
 562 4. It reveals how the foveal value and the connected parameter  $E_2$  were, in fact, derived: as  
 563 an inverse-linear function which fits the data equally well in the measured range of  $1.5^\circ$  –  
 564  $12^\circ$  eccentricity (Figure 7B and 7C, continuous line; note the slight but crucial difference in  
 565 7C the retinotopic centre). From that function, the foveal value and  $E_2$  are readily derived.  
 566 Indeed, the two values correspond to the values given in the paper.

567 The distance of the isoeccentricity lines from the retinotopic centre is not specified in  
 568 Duncan & Boynton (2003). We can derive it from eq. (17), though, because  $M_0$  and  $E_2$  are  
 569 fixed:

$$570 \quad d_{ref} = M_0 \beta E_2. \quad (20)$$

571 With the authors' parameters ( $M_0 = 18.5 \text{ mm}/^\circ$  and  $E_2 = 0.83$ ), the scaling factor  $\beta$  in that  
 572 equation comes out as  $\beta = 1.03$  (from eq. 16). From that,  $d_{ref} = d_{1.5^\circ} = 15.87 \text{ mm}$ . As a further  
 573 check, we can also derive a direct estimate of  $d_{ref}$  from their Fig. 3. For their subject ROD, for  
 574 example, the  $1.5^\circ$  line is at a distance of  $d_{1.5^\circ} = 15.45 \text{ mm}$  on the horizontal meridian. That  
 575 value is only very slightly smaller than the one derived above. For illustration, Figure 5 and  
 576 Figure 6 in the previous section also contain a graph for that value (thin black line).  
 577 Conversely, with  $d_{ref}$  given,  $M_0$  can be derived from eq. (17) (or eq. 20), which gives a slightly  
 578 smaller value of  $M_0 = 18.0 \text{ mm}/^\circ$ . The two curves are hardly distinguishable; thus, as

579 previously stated,  $d_{ref}$  and  $M_0$  interact, with different value-pairs resulting in similarly good  
580 fits.

581 In summary, the parameters in Duncan & Boynton's (2003) paper:  $M_0 = 18.5 \text{ mm/}^\circ$  and  
582  $E_2 = 0.83$ , are supported by direct estimates of the size of  $1^\circ$ -projections. They are taken at  
583 locations estimated from a set of mapping templates, which themselves are derived from a  
584 realistic distance-vs.-eccentricity equation. The paper provides another good example how  
585 the linear concept for the magnification function can be brought together with the  
586 exponential (or logarithmic) location function. The estimate of  $M_0$  comes out considerably  
587 lower than in more recent papers (e.g. Schira et al., 2009; see Figure 8 below). Possibly the  
588 direct estimation of  $M$  at small eccentricities is less reliable than the approach taken in those  
589 papers.

### 590 2.4.3 Mareschal, Morgan & Solomon (2010)

591 Figure 7 shows an additional curve from a paper by Mareschal et al. (2010) on cortical  
592 distance, who base their cortical location function partly on the equation of Duncan &  
593 Boynton (2003). Mareschal et al. (2010) state their location function as

$$594 \quad M'(E) = \begin{cases} (0.065E + 0.054)^{-1} & E < 4^\circ \\ 5.72 - \log_{1.73}(E) & E > 4^\circ \end{cases} \quad (21)$$

595 The upper part of the equation is that of Duncan & Boynton (pink curve) and is used below  
596 an eccentricity of  $4^\circ$ . The green continuous line shows Mareschal's log equation above  $4^\circ$ ,  
597 and the dashed line shows how the log function would continue for values below  $4^\circ$ . As in  
598 the previous examples, the latter is not meaningful and is undefined at zero eccentricity,  
599 which is why Mareschal et al. switched to the inverse-linear function (i.e. the pink curve) at  
600 that point. The problem at low eccentricity is apparent in Fig. 9 of their paper where the x-  
601 axis stops at  $\frac{1}{2}$  deg, so the anomaly is not fully seen. For their analysis, the switch of  
602 functions is not relevant since eccentricities other than  $4^\circ$  and  $10^\circ$  were not tested. However,  
603 the example is added here to illustrate that the case distinction in eq. (21) could be avoided  
604 with the new equations derived here.

### 605 2.4.4 An added exponent: Sereno et al. (1995)

606 To accommodate for a slight curvature in the inverse CMF function (Figure 2A), several  
607 authors have suggested using a modestly nonlinear function for its modelling (Rovamo &  
608 Virsu, 1979; Van Essen et al., 1984; cf. Table 1). One way to achieve this is using a power  
609 function, i.e., adding an exponent to the linear function with a value slightly above 1:

$$610 \quad M^{-1} = M_0^{-1} \cdot (1 + aE)^\alpha \quad (22)$$

611 Van Essen et al. (1984), e.g., use an exponent of 1.1. Following their lead, Sereno et al.  
612 ((1995)) posit

$$613 \quad M(r) = \frac{A}{(r + B)^C} \quad (23)$$

614 for the CMF, where  $A$ ,  $B$ , and exponent  $C$  are free parameters, and  $r$  denotes eccentricity  
615 along a radius (the equations are found in the paper's footnotes 24, 25, and 26). For the case  
616  $C = 0$ , the equation is reduced to the standard inverse-linear function (eq. 1). By integration,  
617 they derive from that the cortical location function, called *mapping function*  $D(r) = \int M(r)dr$  in  
618 their paper:

$$D(r) = \frac{A(r + B)^{1-C}}{1 - C} \quad \text{with } C \neq 0 \quad (24)$$

620 In their fits to the anatomical data,  $C$  comes out with values close to 1.

621 Note that both eq. (22) and (23) are well-defined and meaningful in the retinotopic centre  
622 ( $r=0$ ). Note also, however, that the exponent ( $C$ ) must not be zero for the location function  
623 (eq. 24). I.e., the location function is undefined for the inverse-linear CMF function. That  
624 latter case is discussed in Sereno et al.'s Footnote 26, where  $C = 1$ ; the cortical location  
625 function is then said to converge to

$$D(r) = A \log [r + B]. \quad (25)$$

627 (i.e., similar to eq. 5).

628 In that equation, however, lies the fatal error that led to the avoidance of the (much simpler)  
629 logarithmic location function. On closer inspection and comparison to eq. (5), one can see  
630 that, even though there is a constant term (namely  $B$ ), the scaling factor for the independent  
631 variable  $r$  is missing. The equation should be something like  $D(r) = A \log [Cr + B]$ . Therefore,  $B$   
632 is effectively constrained to 1 because only then is  $D(r=0) = 0$ . In other words, the constant  
633 term  $B$  is not actually a free parameter.

634 Interestingly, Sereno et al. (1995) are aware of the shortcomings of the latter equation. They  
635 write, "Our data could also be fit with this equation, but only if we allowed  $B$  to be negative,  
636 which results in a singularity (infinite magnification factor) before the center-of-gaze is  
637 reached. A good fit without a singularity could only be achieved with  $C$  above 1". They  
638 continue saying, "The combinations of parameters given here fit the cortical distance data  
639 [i.e., referring to the location function] very closely but still give unrealistically large  
640 estimates of cortical magnification at the exact center of the fovea [...], indicating that the  
641 standard equation for  $M$  is inadequate to accurately describe cortical magnification in the  
642 very center of the fovea in humans even with  $C > 1$ ." What went unnoticed is that a simple  
643 remedy would have been using the correct additive constant term and a scaling factor for  $r$ .

#### 644 **2.4.5 Toward the retinotopic centre: Schira et al.**

645 As discussed above, predictions on the properties at the retinotopic centre depend critically  
646 on determining its precise location and thus require data at small eccentricities. Schira, Tyler  
647 and coworkers have addressed that problem in a series of papers (Schira et al., 2007; Schira,  
648 Tyler, Breakspear, & Spehar, 2009; Schira et al., 2010) and provide detailed maps of the  
649 centres of the early visual areas, down to  $0.075^\circ$  eccentricity. They also develop parametric,  
650 closed analytical equations for the 2D maps. When considered for the horizontal direction  
651 only, these equations correspond to those discussed above (eq. 1 and eq. 16/17) (the  
652 equations differ on, and close to, the vertical meridian – Schira et al., 2007; Schira et al.,  
653 2010 – but this is not relevant here).

654 Figure 8 shows magnification factors from Schira et al., 2009, Fig. 7A, with figure part B  
655 showing their V1 data (red curve), but redrawn on double-linear coordinates. As can be  
656 seen, the curve runs close to a hyperbola. Its inverse is shown in Figure 8C, which displays  
657 the familiar, close-to-linear behaviour over a wide range, with a positive y-axis intercept that  
658 corresponds to the value at the retinotopic centre,  $M_0^{-1}$ . From the regression line,  $M_0$  and  $E_2$   
659 are readily obtained and are  $E_2 = 0.21^\circ$  and  $M_0 = 47.6$  mm, respectively. Interestingly, a  
660 rather large value of  $M_0$  is obtained compared to previous reports. Partly (as can also be  
661 seen from the graph) that can be caused by a single, most peripheral point; the centrally

662 located values predict a somewhat shallower slope of the linear function. If one disregards  
 663 that point in the regression, one arrives at a slightly larger  $E_2$  and smaller  $M_0$  value:  $E_2 = 0.33^\circ$   
 664 and  $M_0 = 34.8$  mm. The latter values might be the more accurate predictors for V1's central  
 665 point.

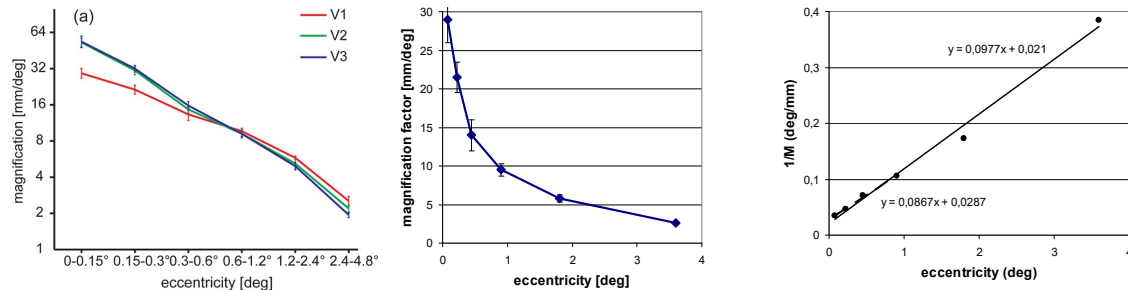

666

667 Figure 8. The cortical magnification factor's dependency on eccentricity from Schira, Tyler, Breakspear &  
 668 Spehar (2009, Fig. 7A). (A) Original graph. (B) V1 data for  $M$ , from Schira et al.'s graph but drawn on double-  
 669 linear coordinates, showing the hyperbola. (C) Resulting inverse factor, again on linear coordinates. The  
 670 regression line,  $M^{-1} = 0.0977 E + 0.021$ , fits the whole set and predicts  $E_2 = 0.21^\circ$  and  $M_0 = 47.6$  mm. The  
 671 regression equation  $M^{-1} = 0.0867 E + 0.0287$  is a fit to only the first four points and might be a better  
 672 predictor for the retinotopic centre, resulting in the values  $E_2 = 0.33^\circ$  and  $M_0 = 34.8$  mm.

673 In summary, the derived equations provide a direct link between the nomenclature more  
 674 well-known in psychophysics and that in the neurophysiological literature on retinotopy.  
 675 They were applied to data for V1 (Fig. 2) but will work equally well for higher early visual  
 676 areas, including V2, V3, and V4 (cf. Larsson & Heeger, 2006, Fig. 5; Schira et al., 2009, Fig. 7).  
 677  $M_0$  is expected to be slightly different for the other areas (Schira et al., 2009, Fig. 7) and so  
 678 will likely be the other parameters.

#### 679 2.4.6 $d_2$ – a structural parameter to describe the cortical map

680 As shown in Section 2.1, a newly defined structural parameter  $d_2$  can be used to describe the  
 681 cortical location function very concisely (eq. 9 or 10). Parameter  $d_2$  is the cortical  
 682 representation of Levi and Klein's  $E_2$ . That is,  $d_2$  is the distance from the retinotopic centre,  
 683 measured in mm, corresponding to eccentricity  $E_2$ , which is where the foveal value doubles.  
 684 Eq. (8) can serve as a means to obtain an estimate for  $d_2$ . Essentially,  $d_2$  is the product of  $M_0$   
 685 and  $E_2$  with a scaling factor. Table 2 gives a summary of  $d_2$  estimates thus derived. The value  
 686 of  $d_2 \approx 8$  mm with  $E_2 = 0.33^\circ$ , based on Schira et al.'s (2009) data which go down to very low  
 687 eccentricities, might be the most accurate estimate currently given their sophisticated  
 688 methodology for assessing the map closely around the retinotopic centre.

689 Similar to what  $E_2$  does for the linear or inverse-linear function – be it the anatomical CMF or  
 690 thresholds in a psychophysical task –  $d_2$  concisely captures the properties of the map in a  
 691 single number. It is given in physical units (mm) and can thus be drawn directly into a  
 692 retinotopic map.  $E_2$  can be (and has been) used as a summary measure for the CMF but is  
 693 not as well-suited because its units are in deg visual angle on the retina (or in the visual  
 694 field), i.e. needs to be translated to spatial, cortical units. Currently, typical characterisations  
 695 of the cortical map are done by drawing iso-eccentricity lines at several eccentricities (10°,  
 696 20°, 30°, etc.). In a similar way, a single  $d_2$  line could be drawn on the cortical map, or  $d_2$   
 697 could be marked as a point on a radius. As a characteristic measure,  $d_2$  could be used in many  
 698 ways, for comparison of the anisotropy in the cortical maps, between species, individuals,

699 gender, etc. Or indeed it could describe any other retinotopic map like those for V2 – V4 or  
 700 that for the LGN, the pulvinar, the reticular nucleus of the thalamus, once data are available.  
 701 Differences between  $d_2$  show a difference in the architecture.

702 That said,  $d_2$  shares certain limitations of  $E_2$  (Strasburger et al., 2011, Fig. 11 and Table 3).  
 703 Like the latter, it relies on data in, and near, the retinotopic centre and can thus be expected  
 704 to be most meaningful at small to medium eccentricities. Its validity for describing the curve  
 705 at larger eccentricities further depends on the premise that location in the map results from  
 706 integrating the local magnification function, i.e., that local magnification factors “add up”.  
 707 For the CMF, that appears to be the case, as evidenced by the good fit of location data  
 708 shown in Figure 5 and other log location functions in the literature. Yet for local properties  
 709 that are likely based on differences in neural wiring, like the colour channels studies in  
 710 D’Souza et al. (2016), that might not be the case.  $d_2$ , in those cases, will characterise the  
 711 function, but not its map.

712 Note in Table 2 that both the estimates for  $M_0$  (the central CMF for V1) and  $E_2$  vary quite a  
 713 bit between neuroanatomical studies. Except for Dougherty et al.’s (2003, Fig. 5) estimate,  
 714 current  $M_0$  estimates are much larger than the old estimates of  $M_0 = 8.55 \text{ mm/}^\circ$  from Cowey  
 715 & Rolls (1974) or  $M_0 = 7.99 \text{ mm/}^\circ$  from Rovamo & Virsu (1979) (for more estimates of  $M_0$ ,  
 716 see Strasburger et al., 2011, Table 5). At the same time, again except Dougherty et al. (2003,  
 717 Fig. 5), modern  $E_2$  values for the CMF on the whole appear smaller than the old values  
 718 (Cowey & Rolls:  $1.75^\circ$ , Rovamo & Virsu:  $3.0^\circ$ ). Since, in essence  $d_2$  is the product of the two,  
 719 these variations in opposite directions are evened by  $d_2$  which indeed varies less between  
 720 studies. This might be another reason why  $d_2$  could be a more suitable structural parameter  
 721 for a retinotopic map than either  $M_0$  or  $E_2$  on its own.

| Study                                                  | $M_0$ [mm/°] | $E_2$ [°] | $d_2$ [mm]  | Curve                               |
|--------------------------------------------------------|--------------|-----------|-------------|-------------------------------------|
| Larsson & Heeger (2006)                                | 35.4         | 0.6       | 14.72       | Fig. 4, pink                        |
| “                                                      | 25.3         | 1.0       | 17.54       | Fig. 4, green                       |
| Duncan & Boynton (2003)                                | 18.5         | 0.831     | 10.66       | Fig. 4, black                       |
| Schira, Tyler, Breakspear & Spehar (2009)              | 47.6         | 0.21      | 6.93        | Fig. 7C                             |
| “                                                      | 34.8         | 0.33      | <b>7.96</b> | Fig. 7C, 2 <sup>nd</sup> regression |
| Dougherty et al. (2003, Fig. 5)                        | 7.4          | 3.67      | 18.8        | Fig. 1C, pink (for V1)              |
| D’Souza, Auer, Frahm, Strasburger & Lee (2016, Fig. 4) | 32.32*       | 0.45      | 10.08       | L-M  Channel                        |
| “                                                      | 32.32*       | 0.97      | 21.73       | Lum Channel                         |
| “                                                      | 32.32*       | 3.4       | 76.17       | S Channel                           |

722 Table 2. Values of the parameter  $d_2$  from an analysis of data in several studies, by eq. (8):  $d_2 = M_0 E_2 \ln(2)$ .  $d_2$   
 723 is the cortical representation of  $E_2$  and characterizes the cortical location function in a single value.

724 \* $M_0$  was not estimated in that paper; the mean of the preceding  $M_0$  values (except Dougherty et al., 2003  
 725 which has an exceptionally low  $M_0$ ) was used for the calculation instead.

### 726 3. Crowding and Bouma’s Law in the cortex

727 The preceding sections were about the cortical location function; in the final section that  
 728 function will be applied to an important property of cortical organization: visual crowding.  
 729 Whereas, in the preceding, cortical *location* was the target of interest, in this section we are  
 730 concerned with cortical *distances*.

731 As reviewed in the introduction, MAR-like functions like acuity generally change in  
732 peripheral vision in that *critical size* scales with eccentricity, so deficits can (mostly) be  
733 compensated for by *M*-scaling (as, e.g. in Rovamo & Virsu, 1979). For crowding, in contrast,  
734 target size plays little role (Strasburger et al., 1991; Pelli et al., 2004; Whitney & Levi, 2011).  
735 Instead, the critical *distance* between target and flankers scales with eccentricity, though at  
736 a different rate than MAR (Rosenholtz, 2016; Strasburger, 2020). This scaling characteristic  
737 of crowding is known as Bouma's rule or Bouma's law (Bouma, 1970; Strasburger et al.,  
738 1991; Pelli et al., 2004; Pelli & Tillman, 2008; Strasburger, 2020). The corresponding  
739 distances in the primary cortical map are thus governed by *differences* of the cortical  
740 location function as derived here in Section 2. Crowding's critical distance (or indeed any  
741 distance, including acuity gap size) is thus, in a sense, a spatial derivative of location. Pattern  
742 recognition, at even slight eccentricities, is governed by the crowding phenomenon and is  
743 largely unrelated to visual acuity (or thus to cortical magnification) (Strasburger et al., 1991;  
744 Pelli et al., 2004; Pelli et al., 2007; Pelli & Tillman, 2008; Strasburger & Wade, 2015). For  
745 understanding crowding it is paramount to look at its cortical basis, since we know since  
746 Flom, Weymouth, & Kahnemann (1963) that crowding is of cortical origin (as also  
747 emphasized by Pelli, 2008).

748 A question that arises naturally in that context then is how the cortical equivalent of critical  
749 crowding distance varies across the visual field. Klein & Levi (1987) were the first to consider  
750 a related question, namely how the cortical distance for distance threshold in a vernier task  
751 varies with eccentricity. They conclude that it is approximately constant. That conclusion was  
752 based on the observation that taking the first derivative of Schwartz's (1980) log mapping  
753 using the constancy assumption will result in the well-known inverse-linear cortical  
754 magnification function. Conversely, their empirically determined position thresholds, when  
755 mapped by an inverse-linear cortical magnification function (with an  $E_2$  of 0.6), turned out  
756 mostly constant across a wide range of eccentricities (cf. Klein & Levi's Fig. 5). Later, Duncan  
757 and Boynton (2003), after estimating *M* based on Schwartz's (1980) log mapping and  
758 applying that to obtain cortical distances (see Section 2.4.2), show that, for scaled vernier  
759 tasks and scaled gratings, the cortical equivalents are again mostly constant (above 1.5°  
760 eccentricity; 2003, Fig. 4). Similarly, with respect to the cortical distance for crowding's  
761 critical distance, it has been proposed that it is likely a constant, with the same reasoning  
762 Motter & Simoni, 2007; Pelli, 2008; Mareschal, Morgan, & Solomon, 2010; oddly, the original  
763 source for the log mapping, Fischer, 1973, is not cited in the above papers).

764 Elegant as it seems as a take-home message, however, the constancy assumption is most  
765 likely incorrect as a general rule and is only true at sufficiently large eccentricities. If stated  
766 as a general rule, it rests on the same shortcut of equating linearity and proportionality, i. e.  
767 the omission of the constant term that gave rise to those cortical location functions that  
768 miss the retinotopic centre (Section 2.3). Based on the properties of the cortical location  
769 function derived in Section 2, it will turn out that the critical cortical crowding distance  
770 increases steeply within the fovea (where, e.g., reading mostly takes place) and reaches an  
771 asymptote beyond perhaps 5° eccentricity, consistent with a constancy at sufficient  
772 eccentricity. Accordingly, Pelli (2008) warns against extrapolating the constancy toward the  
773 retinotopic centre. Remarkably (and to my pleasant surprise), after I had completed the  
774 derivations it turned out that the analytic equation exposed below nicely agrees with those  
775 presented by Motter & Simoni (2007, Fig. 7). In that figure, reproduced here in Figure 9B,  
776 only the more peripheral data above about 10° show the presumed constancy.

777 Let us turn to the equations. Bouma (1970) stated what is now known as Bouma's law for  
778 crowding (Strasburger, 2020):

$$779 \quad \delta_{space} = bE, \quad (26)$$

780 where  $\delta_{space}$  is the free space between the patterns at the critical distance and  $b$  is a  
781 proportionality factor. Bouma (1970) proposed an approximate value of  $b = 0.5 = 50\%$ , which  
782 is now widely cited, but he also mentioned that other proportionality factors might work  
783 equally well; indeed, Pelli et al. (2004) have shown that  $b$  can take quite different values,  
784 depending on the exact visual task. Yet even though the factor may be different between  
785 tasks, the implied linearity of eq. (26) almost always holds up. The law could thus be restated  
786 as saying that free space for critical spacing is proportional to eccentricity, with the  
787 proportionality factor taking some value around 50% or 40%, depending on the task.

788 In today's literature it has become customary to state flanker distance not as free space but  
789 as measured from the respective centres of target and flankers. The critical spacing then  
790 remains largely constant across sizes as Tripathy & Cavanagh, 2002 and others have shown.  
791 To restate Bouma's law for that centre-to-centre distance  $\delta$ , let the target pattern have a  
792 size  $S$  in the radial direction (e.g., *width* in the horizontal), so that  $\delta = S + \delta_{space}$ . Then eq.  
793 (26) becomes

$$794 \quad \delta = bE + S. \quad (27)$$

795 This equation no longer represents proportionality yet is still linear in  $E$ . Importantly,  
796 however, going from Bouma's equation (eq. 26) to that in eq. (27) reflects adding the  
797 constant term that we talked about in the preceding sections. And formally, that equation  
798 (27) is analogous to size scaling as in (2). Analogously to Levi and Klein's  $E_2$  we therefore  
799 introduce a parameter  $\hat{E}_2$  for crowding, as *the eccentricity where the foveal value of critical*  
800 *distance doubles*. Denoting the foveal value of critical distance by  $\delta_0$ , we get, from eq. (27):

$$801 \quad \delta = \delta_0(E / \hat{E}_2 + 1). \quad (28)$$

802 Obviously, that equation is analogous to eq. (1) and (2) that we started out with; it describes  
803 how critical distance in crowding is linearly dependent on (but is not proportional to)  
804 eccentricity in the visual field. In this respect, it thus behaves like acuity and many other  
805 spatial visual performance measures, just with a different slope and axis intercept.

806 With the equations derived in the preceding sections, we can now derive the critical  
807 crowding distance in the cortical map, i.e. the cortical representation of critical distance in  
808 the visual field. Let us denote that distance by  $\kappa$  (kappa). By definition, it is the difference  
809 between the map locations for the target and a flanker at the critical distance in the  
810 crowding task:  $\kappa = d_f - d_t$ . The two cortical locations  $d_f$  and  $d_t$  are, in turn, obtained from  
811 the mapping function, which is given by inverting eq. (6) above:

$$812 \quad d = M_0 E_2 \ln\left(1 + \frac{E}{E_2}\right), \text{ (with } E \geq 0). \quad (29)$$

813 As before,  $d$  is the distance of the location in the cortical map from the retinotopic centre.  
814 So, critical distance  $\kappa$  for crowding in the retinotopic map is the difference of the respective  
815  $d$  values for target and flanker,  $\kappa = d_f - d_t$ :



$$816 \quad \kappa = M_0 E_2 \ln\left(1 + \frac{E_f}{E_2}\right) - M_0 E_2 \ln\left(1 + \frac{E_t}{E_2}\right) = M_0 E_2 \ln\left(\frac{1 + (E_t + \delta_0(E_t/\hat{E}_2 + 1))/E_2}{1 + E_t/E_2}\right) \quad (30)$$

817 (by eq. 29 and 28), where  $E_t$  and  $E_f$  are the respective eccentricities at which target and  
818 flanker are located.

819 After simplifying and setting target eccentricity  $E_t = E$  for generality, this becomes

$$820 \quad \kappa = M_0 E_2 \ln\left(1 + \frac{\delta_0 (1 + E/\hat{E}_2)}{E_2 (1 + E/E_2)}\right) \quad (31)$$

821 Note that we stated that equation previously (Strasburger & Malania, 2013, eq. 13, and  
822 Strasburger et al., 2011, eq. 28), but, alas, incorrectly: a factor was missing.

823 To explore this function, its graph is shown in Figure 9A and we look at two special cases. In  
824 the retinotopic centre, equation (31) predicts a critical distance  $\kappa_0$  in the cortical map of

$$825 \quad \kappa_0 = M_0 E_2 \ln\left(1 + \frac{\delta_0}{E_2}\right) \quad (32)$$

826 With increasing eccentricity,  $\kappa$  departs from that foveal value and increases, depending on  
827 the ratio  $E_2/\hat{E}_2$  (provided  $E_2 > \hat{E}_2$  which can be reasonably assumed; Latham & Whittaker  
828 (1996; Strasburger, 2020). Numerator and denominator are the  $E_2$  values for the location  
829 function and the crowding function, respectively (eq. 1 vs. eq. 28). They are generally  
830 different, so their ratio is not unity.

831 With sufficiently large eccentricity, the equation converges to

$$832 \quad \lim_{E \rightarrow \infty} \kappa = M_0 E_2 \ln\left(1 + \frac{\delta_0}{\hat{E}_2}\right) \quad (33)$$

833 The expression is shown as dashed line in Figure 9A. It is identical to that for the foveal value  
834 in eq. (33) except that  $E_2$  is now replaced by the corresponding value  $\hat{E}_2$  for crowding.

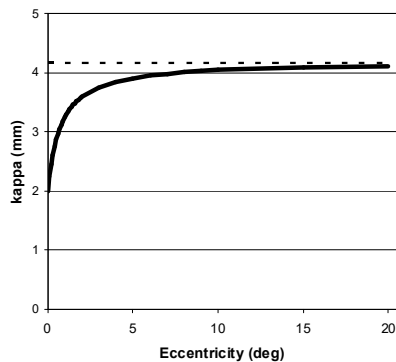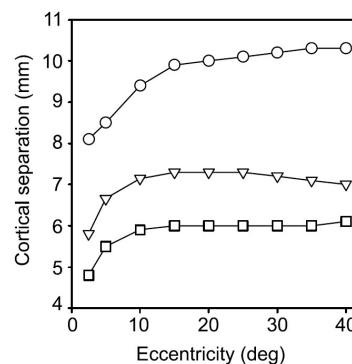

Figure 9. (A) Graph of eq. (31) with realistic values for  $M_0$ ,  $E_2$ ,  $\hat{E}_2$ , and  $\delta_0$ . The value of  $E_2$  for  $M^{-1}$  was chosen as  $E_2 = 0.8^\circ$  from Dow, Snyder, Vautin, & Bauer, 1981 (as cited in Levi et al., 1985, or Strasburger et al., 2011, Table 4).  $M_0 = 29.1$  mm was chosen to give a good fit with this  $E_2$  in Fig. 2. Foveal critical distance was set to  $\delta_0 = 0.1^\circ$  from Siderov, Waugh, & Bedell, 2013, 2014. An  $\hat{E}_2 = 0.36^\circ$  would obtain with this  $\delta_0$  and the value of  $\delta_4 = 1.2^\circ$  in Strasburger et al., 1991; it also serves as an example for being a clearly different value than  $E_2$  for the cortical magnification factor, to see the influence of the  $E_2 / \hat{E}_2$  ratio on the graph. Cortical critical distance  $\kappa$  starts from the value given in eq. (32) for the fovea centre (around 2 mm) and converges to the value in eq. (33). (B) Cortical critical distance for crowding from Motter & Simoni (2007, Fig. 7), showing the qualitative similarity for the dependency. The curves are effectively based on Duncan & Boynton's (2003) inverse-linear equation (see Figure 7B above, pink curve), which implies  $M_0 = 18.5$  mm/ $^\circ$  und  $E_2 = 0.83^\circ$ . The middle curve (triangles) is comparable to the curve in (A). The different asymptote in (B) stems from a different  $M_0$ .

835 Importantly, note that *kappa* varies substantially around the centre, by around two-fold  
836 between the centre and  $5^\circ$  eccentricity with realistic values of  $E_2$  and  $\hat{E}_2$ . This, as said above,  
837 is at odds with the conjecture that the cortical critical crowding distance is basically a  
838 constant (Motter & Simoni, 2007; Pelli, 2008; Mareschal et al., 2010). Pelli (2008) presented  
839 a mathematical derivation for the constancy, very similar to the one presented above –  
840 based on Bouma's law and Schwartz' (1980) logarithmic mapping function. The discrepancy  
841 arises from the underlying assumptions: Pelli used Bouma's law as proportionality, i.e., in its  
842 simplified form stated in eq. (26) (its graph passing through the origin). The simplification  
843 was done on the grounds that the error is small outside the retinotopic centre and plays  
844 little role; the paper appropriately warns that additional provisions must be made at small  
845 eccentricities. Schwartz's (1980) (simplified) mapping function was consequently also used in  
846 its simplified form (without the constant term), for the same reason. With these  
847 simplifications the critical distance in the cortex indeed turns out as simply a constant.

848 As should be expected, at sufficiently high eccentricities  $\kappa$  is close to constant in the  
849 derivations given above (Figure 9). These equations (eq. 31–33) can thus be seen as a  
850 generalization of Pelli's result that now also covers the (obviously important) case of central  
851 vision.

852 For comparison, Figure 9B shows critical crowding spacing on the cortical map from a paper  
853 on visual search by Motter & Simoni (2007). Note that the shown curves, though inspired by  
854 their experimental search data, are not based on these but are based on a cortical-surface  
855 model (shown in their Fig. 1), obtained by *M*-scaling visual distances. Critical distances are  
856 assumed to follow Bouma's law, with a Bouma factor of  $\frac{1}{2}$ . *M*-scaling is by Duncan &  
857 Boynton's (2003) inverse-linear equation ( $1/M(w) = 0.065w + 0.054$ ; shown here in Figure 7B  
858 above, pink curve). The figure's basis is thus the same as in the present paper and effectively  
859 shows Bouma's law mapped onto the cortex. The three curves refer to different flanker  
860 location and reflect crowding asymmetry (see Strasburger, 2020, for review) (upper curve:  
861 peripheral flanker, lower curve: central flanker); the middle curve is is for equal-eccentricity  
862 flanker distances and is the one comparable to the curve in (A). Duncan & Boynton's  
863 equation implies  $M_0 = 18.5$  mm/ $^\circ$  and  $E_2 = 0.83^\circ$  (cf. Table 2 above). That  $E_2$  is similar to that  
864 assumed in Figure 9A;  $M_0$  is different. As we have seen in eq. (33), the asymptote depends  
865 on these two values. The different asymptote in 9B thus stems from the different  $M_0$ .

866 Pelli & Tillman (2008, Online Supplement) derive a value of 6 mm for the asymptote. It is  
867 based on eq. (18) above, as reported by Larsson & Heeger (2006), and a Bouma factor of 0.4.

868 An interesting (though unrealistic) special case of eq. (31) is the one in which  $E_2$  and  $\hat{E}_2$  are  
 869 equal.  $\kappa$  is then a constant, as Pelli (2008) predicted. Its value in that case would be simply  
 870 given by

$$871 \quad \kappa = M_0 E_2 \ln \left( 1 + \frac{\delta_0}{E_2} \right), \text{ for } E_2 = \hat{E}_2. \quad (34)$$

872 On a different note, equations (31)–(34) have  $M_0$  as a scaling factor and, as said before,  $M_0$   
 873 appears to be more difficult to determine empirically. However,  $M_0$  can be replaced, as  
 874 shown above. From eq. (17) we know that

$$875 \quad M_0 E_2 = \frac{d_{ref}}{\beta}, \quad (35)$$

876 which, by the definition of  $\beta$ , takes a particularly simple form when we choose  $d_2$  (the  
 877 cortical equivalent of  $E_2$ ) as the reference:

$$878 \quad M_0 E_2 = \frac{d_2}{\ln 2} \quad (36)$$

879 (this is the same as eq. 8a). We can then rewrite the equation for the critical cortical  
 880 crowding distance (eq. 31) as

$$881 \quad \kappa = \frac{d_2}{\ln 2} \ln \left( 1 + \frac{\delta_0 \left( 1 + \frac{E}{\hat{E}_2} \right)}{E_2 \left( 1 + \frac{E}{E_2} \right)} \right). \quad (37)$$

882 Similarly, the two special cases given in eq. (32) and (33) become

$$883 \quad \kappa_0 = \frac{d_2}{\ln 2} \ln \left( 1 + \frac{\delta_0}{E_2} \right) \quad (38)$$

884 and

$$885 \quad \lim_{E \rightarrow \infty} \kappa = \frac{d_2}{\ln 2} \ln \left( 1 + \frac{\delta_0}{\hat{E}_2} \right). \quad (39)$$

886 Values for  $d_2$  derived from the literature by eq. (36) that could be plugged into eq. (38) and  
 887 (39) were provided in Table 2 above. These two equations ((38) and (39)), for the retinotopic  
 888 centre and eccentricities above around  $5^\circ$ , respectively, could lend themselves for  
 889 determining critical crowding distance in the cortex.

890 In summary for the cortical crowding distance, the two well-established linear eccentricity  
 891 laws –for cortical magnification in neuroscience and critical crowding distance in  
 892 psychophysics –together with Fischer’s (1973) or Schwartz’s (1977; 1980) equally well-  
 893 established logarithmic mapping rule, predict a highly systematic behaviour of crowding’s  
 894 critical distance in the cortical map. Given the very similar mappings in areas V2, V3, V4  
 895 (Larsson & Heeger, 2006; Schira et al., 2009), that relationship can be expected to be similar  
 896 in those areas as well (see Figure 9A for a graph). Since the equations for crowding follow  
 897 mathematically, they should work well there with suitable  $E_2$  values inserted. Thus, direct

898 confirmations of their behaviour can cross-validate mapping models and might shed light on  
899 the cortical mechanisms underlying crowding.

#### 900 **4. Outlook**

901 Where does this leave us? The early cortical visual areas are very regularly organized and  
902 their spatial maps appear to be pretty similar. Yet variation of perceptual performance  
903 across the visual field differs widely between visual tasks, as highlighted by their respective,  
904 widely differing  $E_2$  values. For cortical magnification, in contrast,  $E_2$  estimates appear quite  
905 similar to each other. It is not yet clear how different spatial scalings in psychophysics can  
906 emerge from a largely uniform cortical architecture when there can be only one valid  
907 location function on any radius. The equivalence between psychophysical  $E_2$  and the cortical  
908 location function in the preceding equations thus likely only hold for a single  $E_2$ , presumably  
909 the one pertaining to low-level tasks that are somehow connected to stimulus size.  $\hat{E}_2$  for  
910 critical crowding distance would be an example for a psychophysical descriptor that is  
911 decidedly not related to stimulus size (Tripathy & Cavanagh, 2002; Pelli et al., 2004); it rather  
912 reflects location differences. The underlying cortical architecture that brings about  
913 psychophysical  $E_2$  values different from that of the CMF (like  $\hat{E}_2$ ) could be neural wiring  
914 differences, within or between early visual areas, underneath a similar topography.

915 The link between the (local) CMF function and the (global) cortical location function derived  
916 here rests on the assumption of spatial additivity – that local distances add-up to global  
917 distances and the location function is thus the integral of the CMF function.  $E_2$  values  
918 different from that of the CMF thus do not translate to a location function. When two  
919 different  $E_2$  values act together, as in crowding, nonlinear functions as those in Figure 9  
920 arise.

921 To go further, one of the basic messages of the cortical-magnification literature is the  
922 realization that by  $M$ -scaling stimulus size some, but not all, performance variations are  
923 equalised across the visual field. In parameter space, these other variables can be said to be  
924 *orthogonal* to target size. Pattern contrast is such a variable (Strasburger, Rentschler, &  
925 Harvey, 1994) which needs to be scaled independently from size to equalize performance in  
926 pattern recognition. Temporal resolution is another example (Poggel, Calmanti, Treutwein, &  
927 Strasburger, 2012). Again, differing patterns of connectivity between retinal cell types, visual  
928 areas, and along different processing streams likely underlie these performance differences.  
929 The aim of the present paper is just to point out that a *common spatial location function*  
930 underlies the early cortical architecture that can be described by a unified equation. This  
931 equation includes the fovea including the retinotopic centre, and has parameters that are  
932 common in psychophysics and physiology.

#### 933 **Acknowledgements**

934 I thank Dany d'Souza for the original question, Barry Lee for critical comments on the  
935 manuscript and meticulous language corrections, Zhaoping Li and Josh Solomon for critical  
936 reading, and Zhaoping Li for a thorough check of the mathematical derivations. Thanks also  
937 to an anonymous reviewer for pointing out the paper by Klein & Levi (1987) and a reviewer  
938 who pointed out misleading phrasings.

## 939 References

- 940 Aubert, H. R., & Foerster, C. F. R. (1857). Beiträge zur Kenntniss des indirecten Sehens. (I).  
941 Untersuchungen über den Raumsinn der Retina. *Archiv für Ophthalmologie*, 3, 1-37.
- 942 Bouma, H. (1970). Interaction effects in parafoveal letter recognition. *Nature*, 226, 177-178.
- 943 Cowey, A., & Rolls, E. T. (1974). Human cortical magnification factor and its relation to visual acuity.  
944 *Experimental Brain Research*, 21, 447-454.
- 945 D'Souza, D. V., Auer, T., Strasburger, H., Frahm, J., & Lee, B. B. (2016). Dependence of chromatic  
946 response in V1 on visual field eccentricity and spatial frequency: an fMRI study. *Journal of the*  
947 *Optical Society of America A*, 33(3), A53-A64.
- 948 Daniel, P. M., & Whitteridge, D. (1961). The representation of the visual field on the cerebral cortex  
949 in monkeys. *Journal of Physiology*, 159, 203-221.
- 950 Dougherty, R. F., Koch, V. M., Brewer, A. A., Fischer, B., Modersitzki, J., & Wandell, B. A. (2003). Visual  
951 field representations and locations of visual areas V1/2/3 in human visual cortex. *Journal of*  
952 *Vision*, 3(10), 586-598.
- 953 Dow, B. M., Snyder, R. G., Vautin, R. G., & Bauer, R. (1981). Magnification factor and receptive field  
954 size in foveal striate cortex of the monkey. *Experimental Brain Research*, 44, 213-228.
- 955 Duncan, R. O., & Boynton, G. M. (2003). Cortical magnification within human primary visual cortex.  
956 Correlates with acuity thresholds. *Neuron*, 38, 659-671.
- 957 Engel, S. A., Glover, G. H., & Wandell, B. A. (1997). Retinotopic organization in human visual cortex  
958 and the spatial precision of functional MRI. *Cerebral Cortex*, 7, 181-192.
- 959 Engel, S. A., Rumelhart, D. E., Wandell, B. A., Lee, A. T. L., Glover, G. H., Chichilnisky, E.-J., et al.  
960 (1994). fMRI of human visual cortex. *Nature*, 369(6481), 525.
- 961 Fischer, B. (1973). Overlap of receptive field centers and representation of the visual field in the cat's  
962 optic tract. *Vision Research*, 13, 2113-2120.
- 963 Flom, M. C., Weymouth, F. W., & Kahnemann, D. (1963). Visual resolution and contour interaction. *J.*  
964 *Opt. Soc. Am.* 53, 1026-1032.
- 965 Foster, D. H., Thorson, J., McIlwain, J. T., & Biederman-Thorson, M. (1981). The fine-grain movement  
966 illusion: A perceptual probe of neural connectivity in the human visual system. *Vision Research*,  
967 21, 1123-1128.
- 968 Harvey, B. M., & Dumoulin, S. O. (2011). The relationship between cortical magnification factor and  
969 population receptive field size in human visual cortex: Constancies in cortical architecture. *The*  
970 *Journal of Neuroscience*, 31(38), 13604-13612.
- 971 Harvey, L. O., Jr., & Pöppel, E. (1972). Contrast sensitivity of the human retina. *American Journal of*  
972 *Optometry and Archives of the American Academy of Optometry*, 49, 748-753.
- 973 Horton, J. C., & Hoyt, W. F. (1991). The representation of the visual field in human striate cortex. A  
974 revision of the classic Holmes map. *Archives of Ophthalmology*, 109(6), 816-824.
- 975 Klein, S. A., & Levi, D. M. (1987). Position sense of the peripheral retina. *Journal of the Optical Society*  
976 *of America A*, 4(8), 1543-1553.
- 977 Larsson, J., & Heeger, D. J. (2006). Two retinotopic visual areas in human lateral occipital cortex. *The*  
978 *Journal of Neuroscience*, 26(51), 13128-13142.
- 979 Latham, K., & Whitaker, D. (1996). Relative roles of resolution and spatial interference in foveal and  
980 peripheral vision. *Ophthalmic and Physiological Optics*, 16, 49-57.
- 981 Levi, D. M., Klein, S. A., & Aitsebaomo, A. P. (1984). Detection and discrimination of the direction of  
982 motion in central and peripheral vision of normal and amblyopic observers. *Vision Research*, 24,  
983 789-800.
- 984 Levi, D. M., Klein, S. A., & Aitsebaomo, A. P. (1985). Vernier acuity, crowding and cortical  
985 magnification. *Vision Research*, 25, 963-977.
- 986 Mäkelä, P., Näsänen, R., Rovamo, J., & Melmoth, D. (2001). Identification of facial images in  
987 peripheral vision. *Vision Research*, 41, 599-610.
- 988 Mareschal, I., Morgan, M. J., & Solomon, J. A. (2010). Cortical distance determines whether flankers  
989 cause crowding or the tilt illusion. *Journal of Vision*, 10(8), 13:11-14.

- 990 Motter, B. C., & Simoni, D. A. (2007). The roles of cortical image separation and size in active visual  
991 search performance. *Journal of Vision*, 7(2):6, 1–15.
- 992 Nandy, A. S., & Tjan, B. S. (2012). Saccade-confounded image statistics explain visual crowding.  
993 *Nature Neuroscience*, 15(3), 463-471.
- 994 Oehler, R. (1985). Spatial interactions in the rhesus monkey retina: a behavioural study using the  
995 Westheimer paradigm. *Experimental Brain Research*, 59, 217-225.
- 996 Osterberg, G. (1935). Topography of the layer of rods and cones in the human retina. *Acta*  
997 *Ophthalmologica. Supplement*, 6-10, 11-96.
- 998 Pelli, D. G. (2008). Crowding: a cortical constraint on object recognition. *Current Opinion in*  
999 *Neurobiology*, 18, 445–451.
- 1000 Pelli, D. G., Palomares, M., & Majaj, N. J. (2004). Crowding is unlike ordinary masking: Distinguishing  
1001 feature integration from detection. *Journal of Vision*, 4(12), 1136-1169.
- 1002 Pelli, D. G., & Tillman, K. A. (2008). The uncrowded window of object recognition. *Nature*  
1003 *Neuroscience*, 11(10), 1129-1135 (plus online supplement).
- 1004 Pelli, D. G., Tillman, K. A., Freeman, J., Su, M., Berger, T. D., & Majaj, N. J. (2007). Crowding and  
1005 eccentricity determine reading rate. *Journal of Vision*, 7(2).
- 1006 Poggel, D. A., Calmanti, C., Treutwein, B., & Strasburger, H. (2012). The Tölz Temporal Topography  
1007 Study: Mapping the visual field across the life span. Part II: Cognitive factors shaping visual field  
1008 maps. *Attention, Perception & Psychophysics*, 74, 1133-1144.
- 1009 Pöppel, E., & Harvey, L. O., Jr. (1973). Light-difference threshold and subjective brightness in the  
1010 periphery of the visual field. *Psychologische Forschung*, 36, 145-161.
- 1011 Rovamo, J., & Virsu, V. (1979). An estimation and application of the human cortical magnification  
1012 factor. *Experimental Brain Research*, 37, 495-510.
- 1013 Rovamo, J., Virsu, V., & Näsänen, R. (1978). Cortical magnification factor predicts the photopic  
1014 contrast sensitivity of peripheral vision. *Nature*, 271, 54-56.
- 1015 Schira, M. M., Tyler, C. W., Breakspear, M., & Spehar, B. (2009). The foveal confluence in human  
1016 visual cortex. *The Journal of Neuroscience*, 29 (July 15), 9050–9058.
- 1017 Schira, M. M., Tyler, C. W., Spehar, B., & Breakspear, M. (2010). Modeling magnification and  
1018 anisotropy in the primate foveal confluence. *PLoS Computational Biology*, 6(1), e1000651.
- 1019 Schira, M. M., Wade, A. R., & Tyler, C. W. (2007). Two-dimensional mapping of the central and  
1020 parafoveal visual field to human visual cortex. *Journal of Neurophysiology [Epub ahead of print]*,  
1021 97(6), 4284-4295.
- 1022 Schwartz, E. L. (1977). Spatial mapping in the primate sensory projection: Analytic structure and  
1023 relevance to perception. *Biological Cybernetics*, 25, 181-194.
- 1024 Schwartz, E. L. (1980). Computational anatomy and functional architecture of striate cortex: A spatial  
1025 mapping approach to perceptual coding. *Vision Research*, 20, 645-669.
- 1026 Sereno, M. I., Dale, A. M., Reppas, J. B., Kwong, K. K., Belliveau, J. W., Brady, T. J., et al. (1995).  
1027 Borders of multiple visual areas in humans revealed by functional magnetic resonance imaging.  
1028 *Science* 268, 889–893.
- 1029 Siderov, J., Waugh, S. J., & Bedell, H. E. (2013). Foveal contour interaction for low contrast acuity  
1030 targets. *Vision Research*, 77, 10–13.
- 1031 Siderov, J., Waugh, S. J., & Bedell, H. E. (2014). Foveal contour interaction on the edge: response to  
1032 'letter-to-the-editor' by Drs. Coates and Levi. *Vision Research*, 96, 145-148.
- 1033 Slotnick, S. D., Klein, S. A., Carney, T., & Sutter, E. E. (2001). Electrophysiological estimate of human  
1034 cortical magnification. *Clinical Neurophysiology*, 112(7), 1349-1356.
- 1035 Strasburger, H. (2020). Seven myths on crowding and peripheral vision. *i-Perception*, 11(3), 1-46.
- 1036 Strasburger, H., Harvey, L. O. J., & Rentschler, I. (1991). Contrast thresholds for identification of  
1037 numeric characters in direct and eccentric view. *Perception & Psychophysics*, 49, 495-508.
- 1038 Strasburger, H., & Malania, M. (2013). Source confusion is a major cause of crowding. *Journal of*  
1039 *Vision*, 13(1), 1-20.
- 1040 Strasburger, H., Rentschler, I., & Harvey, L. O., Jr. (1994). Cortical magnification theory fails to predict  
1041 visual recognition. *European Journal of Neuroscience*, 6, 1583-1588.

- 1042 Strasburger, H., Rentschler, I., & Jüttner, M. (2011). Peripheral vision and pattern recognition: a  
1043 review. *Journal of Vision*, 11(5), 1-82.
- 1044 Strasburger, H., & Wade, N. J. (2015). James Jurin (1684–1750): A pioneer of crowding research?  
1045 *Journal of Vision*, 15(1:9), 1-7.
- 1046 Tolhurst, D. J., & Ling, L. (1988). Magnification factors and the organization of the human striate  
1047 cortex. *Human Neurobiology*, 6, 247–254.
- 1048 Tripathy, S. P., & Cavanagh, P. (2002). The extent of crowding in peripheral vision does not scale with  
1049 target size. *Vision Research*, 42, 2357–2369.
- 1050 Van Essen, D. C., Newsome, W. T., & Maunsell, J. H. R. (1984). The visual field representation in  
1051 striate cortex of the macaque monkey: Asymmetries, anisotropies, and individual variability.  
1052 *Vision Research*, 24(5), 429-448.
- 1053 Virsu, V., & Hari, R. (1996). Cortical magnification, scale invariance and visual ecology. *Vision*  
1054 *Research*, 36(18), 2971-2977.
- 1055 Virsu, V., Näsänen, R., & Osmoviita, K. (1987). Cortical magnification and peripheral vision. *Journal of*  
1056 *the Optical Society of America A*, 4, 1568–1578.
- 1057 Virsu, V., & Rovamo, J. (1979). Visual resolution, contrast sensitivity and the cortical magnification  
1058 factor. *Experimental Brain Research*, 37, 475-494.
- 1059 Watson, A. B. (1987). Estimation of local spatial scale. *Journal of the Optical Society of America A*,  
1060 4(8), 1579-1582.
- 1061 Wertheim, T. (1894). Über die indirekte Sehschärfe. *Zeitschrift für Psychologie & Physiologie der*  
1062 *Sinnesorgane*, 7, 172-187.
- 1063 Westheimer, G. (1982). The spatial grain of the perifoveal visual field. *Vision Research*, 22, 157-162.
- 1064 Whitney, D., & Levi, D. M. (2011). Visual crowding: a fundamental limit on conscious perception and  
1065 object recognition. *Trends in Cognitive Sciences*, 15(4), 160-168.
- 1066
- 1067
